# Supplementary material
Source: HighWire-hosted journal article supplement (https://jnis.bmj.com/content/15/6/552)
Supplement: inline-supplementary-material-1 [file inline-supplementary-material-1.pdf]

## ICMJE DISCLOSURE FORM

**Date:** Click or tap to enter a date. 22/11/2021

**Your Name:** Click or tap here to enter text. VINCENT COSTALAT

**Manuscript Title:** Aneurysm treatment with WEB in the combined population of two prospective, multicenter series: 5-year follow-up

**Manuscript Number (if known):** Click or tap here to enter text.

In the interest of transparency, we ask you to disclose all relationships/activities/interests listed below that are related to the content of your manuscript. "Related" means any relation with for-profit or not-for-profit third parties whose interests may be affected by the content of the manuscript. Disclosure represents a commitment to transparency and does not necessarily indicate a bias. If you are in doubt about whether to list a relationship/activity/interest, it is preferable that you do so.

The author's relationships/activities/interests should be defined broadly. For example, if your manuscript pertains to the epidemiology of hypertension, you should declare all relationships with manufacturers of antihypertensive medication, even if that medication is not mentioned in the manuscript.

In item #1 below, report all support for the work reported in this manuscript without time limit. For all other items, the time frame for disclosure is the past 36 months.

|                                                    | Name all entities with whom you have this relationship or indicate none (add rows as needed)            | Specifications/Comments (e.g., if payments were made to you or to your institution) |
|----------------------------------------------------|---------------------------------------------------------------------------------------------------------|-------------------------------------------------------------------------------------|
| Time frame: Since the initial planning of the work |                                                                                                         |                                                                                     |
| 1                                                  | <input checked="" type="checkbox"/> None<br><div> <div></div> <div></div> <div></div> </div>            | <div>Click the tab key to add additional rows.</div>                                |
| Time frame: past 36 months                         |                                                                                                         |                                                                                     |
| 2                                                  | <input type="checkbox"/> None<br><div> <div>NEPHEW</div> <div>COLLEAGUE</div> <div>SCHOLAR</div> </div> | <div> <div>BALTI</div> <div>NEUROVISION</div> </div>                                |
| 3                                                  | <input checked="" type="checkbox"/> None<br><div> <div></div> <div></div> <div></div> </div>            | <div></div>                                                                         |

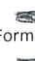

|    |                                                                                                              | Name all entities with whom you have this relationship or indicate none (add rows as needed)                   | Specifications/Comments (e.g., if payments were made to you or to your institution) |
|----|--------------------------------------------------------------------------------------------------------------|----------------------------------------------------------------------------------------------------------------|-------------------------------------------------------------------------------------|
| 4  | Consulting fees                                                                                              | <input type="checkbox"/> None<br><div> <div>Neelbore -</div> <div>Speaker</div> <div>Neurovention</div> </div> | <div>Neuro</div>                                                                    |
| 5  | Payment or honoraria for lectures, presentations, speakers bureaus, manuscript writing or educational events | <input type="checkbox"/> None<br><div> <div>Neelbore</div> <div>Speaker</div> <div>Neurovention</div> </div>   |                                                                                     |
| 6  | Payment for expert testimony                                                                                 | <input checked="" type="checkbox"/> None<br><div></div>                                                        |                                                                                     |
| 7  | Support for attending meetings and/or travel                                                                 | <input checked="" type="checkbox"/> None<br><div></div>                                                        |                                                                                     |
| 8  | Patents planned, issued or pending                                                                           | <input checked="" type="checkbox"/> None<br><div></div>                                                        |                                                                                     |
| 9  | Participation on a Data Safety Monitoring Board or Advisory Board                                            | <input checked="" type="checkbox"/> None<br><div></div>                                                        |                                                                                     |
| 10 | Leadership or fiduciary role in other board, society, committee or advocacy group, paid or unpaid            | <input type="checkbox"/> None<br><div> <div>Sim J Cure</div> </div>                                            |                                                                                     |

|    |                                                                                  | Name all entities with whom you have this relationship or indicate none (add rows as needed) | Specifications/Comments (e.g., if payments were made to you or to your institution) |
|----|----------------------------------------------------------------------------------|----------------------------------------------------------------------------------------------|-------------------------------------------------------------------------------------|
| 11 | Stock or stock options                                                           | <div><input checked="" type="checkbox"/> None</div> <div></div> <div></div> <div></div>      |                                                                                     |
| 12 | Receipt of equipment, materials, drugs, medical writing, gifts or other services | <div><input checked="" type="checkbox"/> None</div> <div></div> <div></div> <div></div>      |                                                                                     |
| 13 | Other financial or non-financial interests                                       | <div><input checked="" type="checkbox"/> None</div> <div></div> <div></div> <div></div>      |                                                                                     |

Please place an "X" next to the following statement to indicate your agreement:

☒ I certify that I have answered every question and have not altered the wording of any of the questions on this form.

*[Signature]*  
21/11/2021

## ICMJE DISCLOSURE FORM

**Date:** 11/5/2021

**Your Name:** herbreteau

**Manuscript Title:** Aneurysm treatment with WEB in the combined population of two prospective, multicenter series: 5-year follow-up

**Manuscript Number (if known):** [Click or tap here to enter text.](#)

In the interest of transparency, we ask you to disclose all relationships/activities/interests listed below that are related to the content of your manuscript. "Related" means any relation with for-profit or not-for-profit third parties whose interests may be affected by the content of the manuscript. Disclosure represents a commitment to transparency and does not necessarily indicate a bias. If you are in doubt about whether to list a relationship/activity/interest, it is preferable that you do so.

The author's relationships/activities/interests should be defined broadly. For example, if your manuscript pertains to the epidemiology of hypertension, you should declare all relationships with manufacturers of antihypertensive medication, even if that medication is not mentioned in the manuscript.

In item #1 below, report all support for the work reported in this manuscript without time limit. For all other items, the time frame for disclosure is the past 36 months.

|                                                           | Name all entities with whom you have this relationship or indicate none (add rows as needed)                                                                                   | Specifications/Comments (e.g., if payments were made to you or to your institution)                                                                                                                          |  |  |  |  |  |  |
|-----------------------------------------------------------|--------------------------------------------------------------------------------------------------------------------------------------------------------------------------------|--------------------------------------------------------------------------------------------------------------------------------------------------------------------------------------------------------------|--|--|--|--|--|--|
| <b>Time frame: Since the initial planning of the work</b> |                                                                                                                                                                                |                                                                                                                                                                                                              |  |  |  |  |  |  |
| <b>1</b>                                                  | All support for the present manuscript (e.g., funding, provision of study materials, medical writing, article processing charges, etc.)<br><b>No time limit for this item.</b> | <input checked="" type="checkbox"/> <b>None</b><br><table border="1"> <tr><td></td><td></td></tr> <tr><td></td><td></td></tr> <tr><td></td><td></td></tr> </table> Click the tab key to add additional rows. |  |  |  |  |  |  |
|                                                           |                                                                                                                                                                                |                                                                                                                                                                                                              |  |  |  |  |  |  |
|                                                           |                                                                                                                                                                                |                                                                                                                                                                                                              |  |  |  |  |  |  |
|                                                           |                                                                                                                                                                                |                                                                                                                                                                                                              |  |  |  |  |  |  |
| <b>Time frame: past 36 months</b>                         |                                                                                                                                                                                |                                                                                                                                                                                                              |  |  |  |  |  |  |
| <b>2</b>                                                  | Grants or contracts from any entity (if not indicated in item #1 above).                                                                                                       | <input checked="" type="checkbox"/> <b>None</b><br><table border="1"> <tr><td></td><td></td></tr> <tr><td></td><td></td></tr> <tr><td></td><td></td></tr> </table>                                           |  |  |  |  |  |  |
|                                                           |                                                                                                                                                                                |                                                                                                                                                                                                              |  |  |  |  |  |  |
|                                                           |                                                                                                                                                                                |                                                                                                                                                                                                              |  |  |  |  |  |  |
|                                                           |                                                                                                                                                                                |                                                                                                                                                                                                              |  |  |  |  |  |  |
| <b>3</b>                                                  | Royalties or licenses                                                                                                                                                          | <input checked="" type="checkbox"/> <b>None</b><br><table border="1"> <tr><td></td><td></td></tr> <tr><td></td><td></td></tr> <tr><td></td><td></td></tr> </table>                                           |  |  |  |  |  |  |
|                                                           |                                                                                                                                                                                |                                                                                                                                                                                                              |  |  |  |  |  |  |
|                                                           |                                                                                                                                                                                |                                                                                                                                                                                                              |  |  |  |  |  |  |
|                                                           |                                                                                                                                                                                |                                                                                                                                                                                                              |  |  |  |  |  |  |

|              |                                                                                                              | Name all entities with whom you have this relationship or indicate none (add rows as needed)                                                                                            | Specifications/Comments (e.g., if payments were made to you or to your institution) |             |  |  |  |  |  |  |  |
|--------------|--------------------------------------------------------------------------------------------------------------|-----------------------------------------------------------------------------------------------------------------------------------------------------------------------------------------|-------------------------------------------------------------------------------------|-------------|--|--|--|--|--|--|--|
| 4            | Consulting fees                                                                                              | <input checked="" type="checkbox"/> None<br><table border="1"> <tr><td></td><td></td></tr> <tr><td></td><td></td></tr> <tr><td></td><td></td></tr> <tr><td></td><td></td></tr> </table> |                                                                                     |             |  |  |  |  |  |  |  |
|              |                                                                                                              |                                                                                                                                                                                         |                                                                                     |             |  |  |  |  |  |  |  |
|              |                                                                                                              |                                                                                                                                                                                         |                                                                                     |             |  |  |  |  |  |  |  |
|              |                                                                                                              |                                                                                                                                                                                         |                                                                                     |             |  |  |  |  |  |  |  |
|              |                                                                                                              |                                                                                                                                                                                         |                                                                                     |             |  |  |  |  |  |  |  |
| 5            | Payment or honoraria for lectures, presentations, speakers bureaus, manuscript writing or educational events | <input type="checkbox"/> None<br><table border="1"> <tr> <td>microvention</td> <td>proctoring</td> </tr> <tr><td></td><td></td></tr> <tr><td></td><td></td></tr> </table>               | microvention                                                                        | proctoring  |  |  |  |  |  |  |  |
| microvention | proctoring                                                                                                   |                                                                                                                                                                                         |                                                                                     |             |  |  |  |  |  |  |  |
|              |                                                                                                              |                                                                                                                                                                                         |                                                                                     |             |  |  |  |  |  |  |  |
|              |                                                                                                              |                                                                                                                                                                                         |                                                                                     |             |  |  |  |  |  |  |  |
| 6            | Payment for expert testimony                                                                                 | <input checked="" type="checkbox"/> None<br><table border="1"> <tr><td></td><td></td></tr> <tr><td></td><td></td></tr> <tr><td></td><td></td></tr> </table>                             |                                                                                     |             |  |  |  |  |  |  |  |
|              |                                                                                                              |                                                                                                                                                                                         |                                                                                     |             |  |  |  |  |  |  |  |
|              |                                                                                                              |                                                                                                                                                                                         |                                                                                     |             |  |  |  |  |  |  |  |
|              |                                                                                                              |                                                                                                                                                                                         |                                                                                     |             |  |  |  |  |  |  |  |
| 7            | Support for attending meetings and/or travel                                                                 | <input type="checkbox"/> None<br><table border="1"> <tr> <td>microvention</td> <td>institution</td> </tr> <tr><td></td><td></td></tr> <tr><td></td><td></td></tr> </table>              | microvention                                                                        | institution |  |  |  |  |  |  |  |
| microvention | institution                                                                                                  |                                                                                                                                                                                         |                                                                                     |             |  |  |  |  |  |  |  |
|              |                                                                                                              |                                                                                                                                                                                         |                                                                                     |             |  |  |  |  |  |  |  |
|              |                                                                                                              |                                                                                                                                                                                         |                                                                                     |             |  |  |  |  |  |  |  |
| 8            | Patents planned, issued or pending                                                                           | <input checked="" type="checkbox"/> None<br><table border="1"> <tr><td></td><td></td></tr> <tr><td></td><td></td></tr> <tr><td></td><td></td></tr> </table>                             |                                                                                     |             |  |  |  |  |  |  |  |
|              |                                                                                                              |                                                                                                                                                                                         |                                                                                     |             |  |  |  |  |  |  |  |
|              |                                                                                                              |                                                                                                                                                                                         |                                                                                     |             |  |  |  |  |  |  |  |
|              |                                                                                                              |                                                                                                                                                                                         |                                                                                     |             |  |  |  |  |  |  |  |
| 9            | Participation on a Data Safety Monitoring Board or Advisory Board                                            | <input checked="" type="checkbox"/> None<br><table border="1"> <tr><td></td><td></td></tr> <tr><td></td><td></td></tr> <tr><td></td><td></td></tr> </table>                             |                                                                                     |             |  |  |  |  |  |  |  |
|              |                                                                                                              |                                                                                                                                                                                         |                                                                                     |             |  |  |  |  |  |  |  |
|              |                                                                                                              |                                                                                                                                                                                         |                                                                                     |             |  |  |  |  |  |  |  |
|              |                                                                                                              |                                                                                                                                                                                         |                                                                                     |             |  |  |  |  |  |  |  |
| 10           | Leadership or fiduciary role in other board, society, committee or advocacy group, paid or unpaid            | <input checked="" type="checkbox"/> None<br><table border="1"> <tr><td></td><td></td></tr> <tr><td></td><td></td></tr> <tr><td></td><td></td></tr> </table>                             |                                                                                     |             |  |  |  |  |  |  |  |
|              |                                                                                                              |                                                                                                                                                                                         |                                                                                     |             |  |  |  |  |  |  |  |
|              |                                                                                                              |                                                                                                                                                                                         |                                                                                     |             |  |  |  |  |  |  |  |
|              |                                                                                                              |                                                                                                                                                                                         |                                                                                     |             |  |  |  |  |  |  |  |

|    |                                                                                  | Name all entities with whom you have this relationship or indicate none (add rows as needed)                                                                | Specifications/Comments (e.g., if payments were made to you or to your institution) |  |  |  |  |  |  |
|----|----------------------------------------------------------------------------------|-------------------------------------------------------------------------------------------------------------------------------------------------------------|-------------------------------------------------------------------------------------|--|--|--|--|--|--|
| 11 | Stock or stock options                                                           | <input checked="" type="checkbox"/> None<br><table border="1"> <tr><td></td><td></td></tr> <tr><td></td><td></td></tr> <tr><td></td><td></td></tr> </table> |                                                                                     |  |  |  |  |  |  |
|    |                                                                                  |                                                                                                                                                             |                                                                                     |  |  |  |  |  |  |
|    |                                                                                  |                                                                                                                                                             |                                                                                     |  |  |  |  |  |  |
|    |                                                                                  |                                                                                                                                                             |                                                                                     |  |  |  |  |  |  |
| 12 | Receipt of equipment, materials, drugs, medical writing, gifts or other services | <input checked="" type="checkbox"/> None<br><table border="1"> <tr><td></td><td></td></tr> <tr><td></td><td></td></tr> <tr><td></td><td></td></tr> </table> |                                                                                     |  |  |  |  |  |  |
|    |                                                                                  |                                                                                                                                                             |                                                                                     |  |  |  |  |  |  |
|    |                                                                                  |                                                                                                                                                             |                                                                                     |  |  |  |  |  |  |
|    |                                                                                  |                                                                                                                                                             |                                                                                     |  |  |  |  |  |  |
| 13 | Other financial or non-financial interests                                       | <input checked="" type="checkbox"/> None<br><table border="1"> <tr><td></td><td></td></tr> <tr><td></td><td></td></tr> <tr><td></td><td></td></tr> </table> |                                                                                     |  |  |  |  |  |  |
|    |                                                                                  |                                                                                                                                                             |                                                                                     |  |  |  |  |  |  |
|    |                                                                                  |                                                                                                                                                             |                                                                                     |  |  |  |  |  |  |
|    |                                                                                  |                                                                                                                                                             |                                                                                     |  |  |  |  |  |  |

**Please place an "X" next to the following statement to indicate your agreement:**

☒ I certify that I have answered every question and have not altered the wording of any of the questions on this form.

## ICMJE DISCLOSURE FORM

**Date:** 4/11/2021

**Your Name:** SPELLE Laurent

**Manuscript Title:** Aneurysm treatment with WEB in the combined population of two prospective, multicenter series: 5-year follow-up

**Manuscript Number (if known):** neurintsurg-2021-018414

In the interest of transparency, we ask you to disclose all relationships/activities/interests listed below that are related to the content of your manuscript. "Related" means any relation with for-profit or not-for-profit third parties whose interests may be affected by the content of the manuscript. Disclosure represents a commitment to transparency and does not necessarily indicate a bias. If you are in doubt about whether to list a relationship/activity/interest, it is preferable that you do so.

The author's relationships/activities/interests should be defined broadly. For example, if your manuscript pertains to the epidemiology of hypertension, you should declare all relationships with manufacturers of antihypertensive medication, even if that medication is not mentioned in the manuscript.

In item #1 below, report all support for the work reported in this manuscript without time limit. For all other items, the time frame for disclosure is the past 36 months.

|                                                           | Name all entities with whom you have this relationship or indicate none (add rows as needed)                                                                                   | Specifications/Comments (e.g., if payments were made to you or to your institution)                                                                                                                         |         |                                |  |  |  |                                           |
|-----------------------------------------------------------|--------------------------------------------------------------------------------------------------------------------------------------------------------------------------------|-------------------------------------------------------------------------------------------------------------------------------------------------------------------------------------------------------------|---------|--------------------------------|--|--|--|-------------------------------------------|
| <b>Time frame: Since the initial planning of the work</b> |                                                                                                                                                                                |                                                                                                                                                                                                             |         |                                |  |  |  |                                           |
| <b>1</b>                                                  | All support for the present manuscript (e.g., funding, provision of study materials, medical writing, article processing charges, etc.)<br><b>No time limit for this item.</b> | <input checked="" type="checkbox"/> <b>None</b><br><table border="1"> <tr><td></td><td></td></tr> <tr><td></td><td></td></tr> <tr><td></td><td>Click the tab key to add additional rows.</td></tr> </table> |         |                                |  |  |  | Click the tab key to add additional rows. |
|                                                           |                                                                                                                                                                                |                                                                                                                                                                                                             |         |                                |  |  |  |                                           |
|                                                           |                                                                                                                                                                                |                                                                                                                                                                                                             |         |                                |  |  |  |                                           |
|                                                           | Click the tab key to add additional rows.                                                                                                                                      |                                                                                                                                                                                                             |         |                                |  |  |  |                                           |
| <b>Time frame: past 36 months</b>                         |                                                                                                                                                                                |                                                                                                                                                                                                             |         |                                |  |  |  |                                           |
| <b>2</b>                                                  | Grants or contracts from any entity (if not indicated in item #1 above).                                                                                                       | <input type="checkbox"/> <b>None</b><br><table border="1"> <tr> <td>Philips</td> <td>Research grant to the hospital</td> </tr> <tr><td></td><td></td></tr> <tr><td></td><td></td></tr> </table>             | Philips | Research grant to the hospital |  |  |  |                                           |
| Philips                                                   | Research grant to the hospital                                                                                                                                                 |                                                                                                                                                                                                             |         |                                |  |  |  |                                           |
|                                                           |                                                                                                                                                                                |                                                                                                                                                                                                             |         |                                |  |  |  |                                           |
|                                                           |                                                                                                                                                                                |                                                                                                                                                                                                             |         |                                |  |  |  |                                           |
| <b>3</b>                                                  | Royalties or licenses                                                                                                                                                          | <input checked="" type="checkbox"/> <b>None</b><br><table border="1"> <tr><td></td><td></td></tr> <tr><td></td><td></td></tr> <tr><td></td><td></td></tr> </table>                                          |         |                                |  |  |  |                                           |
|                                                           |                                                                                                                                                                                |                                                                                                                                                                                                             |         |                                |  |  |  |                                           |
|                                                           |                                                                                                                                                                                |                                                                                                                                                                                                             |         |                                |  |  |  |                                           |
|                                                           |                                                                                                                                                                                |                                                                                                                                                                                                             |         |                                |  |  |  |                                           |



|                                                |                                                                                                              | Name all entities with whom you have this relationship or indicate none (add rows as needed)                                                                                                                                                   | Specifications/Comments (e.g., if payments were made to you or to your institution) |                                                |                |  |  |  |  |  |  |
|------------------------------------------------|--------------------------------------------------------------------------------------------------------------|------------------------------------------------------------------------------------------------------------------------------------------------------------------------------------------------------------------------------------------------|-------------------------------------------------------------------------------------|------------------------------------------------|----------------|--|--|--|--|--|--|
| 4                                              | Consulting fees                                                                                              | <input type="checkbox"/> None <table border="1"> <tr> <td>Balt, Medtronic, Phenox, Microvention, Stryker</td> <td>Payments to me</td> </tr> <tr><td> </td><td> </td></tr> <tr><td> </td><td> </td></tr> <tr><td> </td><td> </td></tr> </table> |                                                                                     | Balt, Medtronic, Phenox, Microvention, Stryker | Payments to me |  |  |  |  |  |  |
| Balt, Medtronic, Phenox, Microvention, Stryker | Payments to me                                                                                               |                                                                                                                                                                                                                                                |                                                                                     |                                                |                |  |  |  |  |  |  |
|                                                |                                                                                                              |                                                                                                                                                                                                                                                |                                                                                     |                                                |                |  |  |  |  |  |  |
|                                                |                                                                                                              |                                                                                                                                                                                                                                                |                                                                                     |                                                |                |  |  |  |  |  |  |
|                                                |                                                                                                              |                                                                                                                                                                                                                                                |                                                                                     |                                                |                |  |  |  |  |  |  |
| 5                                              | Payment or honoraria for lectures, presentations, speakers bureaus, manuscript writing or educational events | <input type="checkbox"/> None <table border="1"> <tr> <td>Balt, Medtronic, Microvention, Stryker</td> <td>Payments to me</td> </tr> <tr><td> </td><td> </td></tr> <tr><td> </td><td> </td></tr> </table>                                       |                                                                                     | Balt, Medtronic, Microvention, Stryker         | Payments to me |  |  |  |  |  |  |
| Balt, Medtronic, Microvention, Stryker         | Payments to me                                                                                               |                                                                                                                                                                                                                                                |                                                                                     |                                                |                |  |  |  |  |  |  |
|                                                |                                                                                                              |                                                                                                                                                                                                                                                |                                                                                     |                                                |                |  |  |  |  |  |  |
|                                                |                                                                                                              |                                                                                                                                                                                                                                                |                                                                                     |                                                |                |  |  |  |  |  |  |
| 6                                              | Payment for expert testimony                                                                                 | <input checked="" type="checkbox"/> None <table border="1"> <tr><td> </td><td> </td></tr> <tr><td> </td><td> </td></tr> <tr><td> </td><td> </td></tr> </table>                                                                                 |                                                                                     |                                                |                |  |  |  |  |  |  |
|                                                |                                                                                                              |                                                                                                                                                                                                                                                |                                                                                     |                                                |                |  |  |  |  |  |  |
|                                                |                                                                                                              |                                                                                                                                                                                                                                                |                                                                                     |                                                |                |  |  |  |  |  |  |
|                                                |                                                                                                              |                                                                                                                                                                                                                                                |                                                                                     |                                                |                |  |  |  |  |  |  |
| 7                                              | Support for attending meetings and/or travel                                                                 | <input type="checkbox"/> None <table border="1"> <tr> <td>Balt, Medtronic, Microvention, Stryker</td> <td>Payments to me</td> </tr> <tr><td> </td><td> </td></tr> <tr><td> </td><td> </td></tr> </table>                                       |                                                                                     | Balt, Medtronic, Microvention, Stryker         | Payments to me |  |  |  |  |  |  |
| Balt, Medtronic, Microvention, Stryker         | Payments to me                                                                                               |                                                                                                                                                                                                                                                |                                                                                     |                                                |                |  |  |  |  |  |  |
|                                                |                                                                                                              |                                                                                                                                                                                                                                                |                                                                                     |                                                |                |  |  |  |  |  |  |
|                                                |                                                                                                              |                                                                                                                                                                                                                                                |                                                                                     |                                                |                |  |  |  |  |  |  |
| 8                                              | Patents planned, issued or pending                                                                           | <input checked="" type="checkbox"/> None <table border="1"> <tr><td> </td><td> </td></tr> <tr><td> </td><td> </td></tr> <tr><td> </td><td> </td></tr> </table>                                                                                 |                                                                                     |                                                |                |  |  |  |  |  |  |
|                                                |                                                                                                              |                                                                                                                                                                                                                                                |                                                                                     |                                                |                |  |  |  |  |  |  |
|                                                |                                                                                                              |                                                                                                                                                                                                                                                |                                                                                     |                                                |                |  |  |  |  |  |  |
|                                                |                                                                                                              |                                                                                                                                                                                                                                                |                                                                                     |                                                |                |  |  |  |  |  |  |
| 9                                              | Participation on a Data Safety Monitoring Board or Advisory Board                                            | <input checked="" type="checkbox"/> None <table border="1"> <tr><td> </td><td> </td></tr> <tr><td> </td><td> </td></tr> <tr><td> </td><td> </td></tr> </table>                                                                                 |                                                                                     |                                                |                |  |  |  |  |  |  |
|                                                |                                                                                                              |                                                                                                                                                                                                                                                |                                                                                     |                                                |                |  |  |  |  |  |  |
|                                                |                                                                                                              |                                                                                                                                                                                                                                                |                                                                                     |                                                |                |  |  |  |  |  |  |
|                                                |                                                                                                              |                                                                                                                                                                                                                                                |                                                                                     |                                                |                |  |  |  |  |  |  |
| 10                                             | Leadership or fiduciary role in other board, society, committee or advocacy group, paid or unpaid            | <input checked="" type="checkbox"/> None <table border="1"> <tr><td> </td><td> </td></tr> <tr><td> </td><td> </td></tr> <tr><td> </td><td> </td></tr> </table>                                                                                 |                                                                                     |                                                |                |  |  |  |  |  |  |
|                                                |                                                                                                              |                                                                                                                                                                                                                                                |                                                                                     |                                                |                |  |  |  |  |  |  |
|                                                |                                                                                                              |                                                                                                                                                                                                                                                |                                                                                     |                                                |                |  |  |  |  |  |  |
|                                                |                                                                                                              |                                                                                                                                                                                                                                                |                                                                                     |                                                |                |  |  |  |  |  |  |



|    |                                                                                  | Name all entities with whom you have this relationship or indicate none (add rows as needed)                                                         | Specifications/Comments (e.g., if payments were made to you or to your institution) |  |  |  |  |  |  |
|----|----------------------------------------------------------------------------------|------------------------------------------------------------------------------------------------------------------------------------------------------|-------------------------------------------------------------------------------------|--|--|--|--|--|--|
| 11 | Stock or stock options                                                           | <div><input checked="" type="checkbox"/> None</div> <table><tr><td></td><td></td></tr><tr><td></td><td></td></tr><tr><td></td><td></td></tr></table> |                                                                                     |  |  |  |  |  |  |
|    |                                                                                  |                                                                                                                                                      |                                                                                     |  |  |  |  |  |  |
|    |                                                                                  |                                                                                                                                                      |                                                                                     |  |  |  |  |  |  |
|    |                                                                                  |                                                                                                                                                      |                                                                                     |  |  |  |  |  |  |
| 12 | Receipt of equipment, materials, drugs, medical writing, gifts or other services | <div><input checked="" type="checkbox"/> None</div> <table><tr><td></td><td></td></tr><tr><td></td><td></td></tr><tr><td></td><td></td></tr></table> |                                                                                     |  |  |  |  |  |  |
|    |                                                                                  |                                                                                                                                                      |                                                                                     |  |  |  |  |  |  |
|    |                                                                                  |                                                                                                                                                      |                                                                                     |  |  |  |  |  |  |
|    |                                                                                  |                                                                                                                                                      |                                                                                     |  |  |  |  |  |  |
| 13 | Other financial or non-financial interests                                       | <div><input checked="" type="checkbox"/> None</div> <table><tr><td></td><td></td></tr><tr><td></td><td></td></tr><tr><td></td><td></td></tr></table> |                                                                                     |  |  |  |  |  |  |
|    |                                                                                  |                                                                                                                                                      |                                                                                     |  |  |  |  |  |  |
|    |                                                                                  |                                                                                                                                                      |                                                                                     |  |  |  |  |  |  |
|    |                                                                                  |                                                                                                                                                      |                                                                                     |  |  |  |  |  |  |

Please place an "X" next to the following statement to indicate your agreement:

☒ I certify that I have answered every question and have not altered the wording of any of the questions on this form.

## ICMJE DISCLOSURE FORM

**Date:** 11/4/2021

**Your Name:** Joachim Klisch

**Manuscript Title:** Aneurysm treatment with WEB in the combined population of two prospective, multicenter series: 5-year follow-up

**Manuscript Number (if known):** [Click or tap here to enter text.](#)

In the interest of transparency, we ask you to disclose all relationships/activities/interests listed below that are related to the content of your manuscript. "Related" means any relation with for-profit or not-for-profit third parties whose interests may be affected by the content of the manuscript. Disclosure represents a commitment to transparency and does not necessarily indicate a bias. If you are in doubt about whether to list a relationship/activity/interest, it is preferable that you do so.

The author's relationships/activities/interests should be defined broadly. For example, if your manuscript pertains to the epidemiology of hypertension, you should declare all relationships with manufacturers of antihypertensive medication, even if that medication is not mentioned in the manuscript.

In item #1 below, report all support for the work reported in this manuscript without time limit. For all other items, the time frame for disclosure is the past 36 months.

|                                                           | Name all entities with whom you have this relationship or indicate none (add rows as needed)                                                                                   | Specifications/Comments (e.g., if payments were made to you or to your institution)                                                                                                                          |  |  |  |  |  |  |
|-----------------------------------------------------------|--------------------------------------------------------------------------------------------------------------------------------------------------------------------------------|--------------------------------------------------------------------------------------------------------------------------------------------------------------------------------------------------------------|--|--|--|--|--|--|
| <b>Time frame: Since the initial planning of the work</b> |                                                                                                                                                                                |                                                                                                                                                                                                              |  |  |  |  |  |  |
| <b>1</b>                                                  | All support for the present manuscript (e.g., funding, provision of study materials, medical writing, article processing charges, etc.)<br><b>No time limit for this item.</b> | <input checked="" type="checkbox"/> <b>None</b><br><table border="1"> <tr><td></td><td></td></tr> <tr><td></td><td></td></tr> <tr><td></td><td></td></tr> </table> Click the tab key to add additional rows. |  |  |  |  |  |  |
|                                                           |                                                                                                                                                                                |                                                                                                                                                                                                              |  |  |  |  |  |  |
|                                                           |                                                                                                                                                                                |                                                                                                                                                                                                              |  |  |  |  |  |  |
|                                                           |                                                                                                                                                                                |                                                                                                                                                                                                              |  |  |  |  |  |  |
| <b>Time frame: past 36 months</b>                         |                                                                                                                                                                                |                                                                                                                                                                                                              |  |  |  |  |  |  |
| <b>2</b>                                                  | Grants or contracts from any entity (if not indicated in item #1 above).                                                                                                       | <input checked="" type="checkbox"/> <b>None</b><br><table border="1"> <tr><td></td><td></td></tr> <tr><td></td><td></td></tr> <tr><td></td><td></td></tr> </table>                                           |  |  |  |  |  |  |
|                                                           |                                                                                                                                                                                |                                                                                                                                                                                                              |  |  |  |  |  |  |
|                                                           |                                                                                                                                                                                |                                                                                                                                                                                                              |  |  |  |  |  |  |
|                                                           |                                                                                                                                                                                |                                                                                                                                                                                                              |  |  |  |  |  |  |
| <b>3</b>                                                  | Royalties or licenses                                                                                                                                                          | <input checked="" type="checkbox"/> <b>None</b><br><table border="1"> <tr><td></td><td></td></tr> <tr><td></td><td></td></tr> <tr><td></td><td></td></tr> </table>                                           |  |  |  |  |  |  |
|                                                           |                                                                                                                                                                                |                                                                                                                                                                                                              |  |  |  |  |  |  |
|                                                           |                                                                                                                                                                                |                                                                                                                                                                                                              |  |  |  |  |  |  |
|                                                           |                                                                                                                                                                                |                                                                                                                                                                                                              |  |  |  |  |  |  |

|                                     |                                                                                                              | Name all entities with whom you have this relationship or indicate none (add rows as needed)                                                                                                                                                             | Specifications/Comments (e.g., if payments were made to you or to your institution) |                           |  |  |  |  |  |  |  |
|-------------------------------------|--------------------------------------------------------------------------------------------------------------|----------------------------------------------------------------------------------------------------------------------------------------------------------------------------------------------------------------------------------------------------------|-------------------------------------------------------------------------------------|---------------------------|--|--|--|--|--|--|--|
| 4                                   | Consulting fees                                                                                              | <input type="checkbox"/> None<br><table border="1"> <tr> <td>Consulting to Microvention &amp; Phenox</td> <td>Payment to my institution</td> </tr> <tr> <td></td> <td></td> </tr> <tr> <td></td> <td></td> </tr> <tr> <td></td> <td></td> </tr> </table> | Consulting to Microvention & Phenox                                                 | Payment to my institution |  |  |  |  |  |  |  |
| Consulting to Microvention & Phenox | Payment to my institution                                                                                    |                                                                                                                                                                                                                                                          |                                                                                     |                           |  |  |  |  |  |  |  |
|                                     |                                                                                                              |                                                                                                                                                                                                                                                          |                                                                                     |                           |  |  |  |  |  |  |  |
|                                     |                                                                                                              |                                                                                                                                                                                                                                                          |                                                                                     |                           |  |  |  |  |  |  |  |
|                                     |                                                                                                              |                                                                                                                                                                                                                                                          |                                                                                     |                           |  |  |  |  |  |  |  |
| 5                                   | Payment or honoraria for lectures, presentations, speakers bureaus, manuscript writing or educational events | <input checked="" type="checkbox"/> None<br><table border="1"> <tr> <td></td> <td></td> </tr> <tr> <td></td> <td></td> </tr> <tr> <td></td> <td></td> </tr> </table>                                                                                     |                                                                                     |                           |  |  |  |  |  |  |  |
|                                     |                                                                                                              |                                                                                                                                                                                                                                                          |                                                                                     |                           |  |  |  |  |  |  |  |
|                                     |                                                                                                              |                                                                                                                                                                                                                                                          |                                                                                     |                           |  |  |  |  |  |  |  |
|                                     |                                                                                                              |                                                                                                                                                                                                                                                          |                                                                                     |                           |  |  |  |  |  |  |  |
| 6                                   | Payment for expert testimony                                                                                 | <input checked="" type="checkbox"/> None<br><table border="1"> <tr> <td></td> <td></td> </tr> <tr> <td></td> <td></td> </tr> <tr> <td></td> <td></td> </tr> </table>                                                                                     |                                                                                     |                           |  |  |  |  |  |  |  |
|                                     |                                                                                                              |                                                                                                                                                                                                                                                          |                                                                                     |                           |  |  |  |  |  |  |  |
|                                     |                                                                                                              |                                                                                                                                                                                                                                                          |                                                                                     |                           |  |  |  |  |  |  |  |
|                                     |                                                                                                              |                                                                                                                                                                                                                                                          |                                                                                     |                           |  |  |  |  |  |  |  |
| 7                                   | Support for attending meetings and/or travel                                                                 | <input checked="" type="checkbox"/> None<br><table border="1"> <tr> <td></td> <td></td> </tr> <tr> <td></td> <td></td> </tr> <tr> <td></td> <td></td> </tr> </table>                                                                                     |                                                                                     |                           |  |  |  |  |  |  |  |
|                                     |                                                                                                              |                                                                                                                                                                                                                                                          |                                                                                     |                           |  |  |  |  |  |  |  |
|                                     |                                                                                                              |                                                                                                                                                                                                                                                          |                                                                                     |                           |  |  |  |  |  |  |  |
|                                     |                                                                                                              |                                                                                                                                                                                                                                                          |                                                                                     |                           |  |  |  |  |  |  |  |
| 8                                   | Patents planned, issued or pending                                                                           | <input type="checkbox"/> None<br><table border="1"> <tr> <td></td> <td></td> </tr> <tr> <td></td> <td></td> </tr> <tr> <td></td> <td></td> </tr> </table>                                                                                                |                                                                                     |                           |  |  |  |  |  |  |  |
|                                     |                                                                                                              |                                                                                                                                                                                                                                                          |                                                                                     |                           |  |  |  |  |  |  |  |
|                                     |                                                                                                              |                                                                                                                                                                                                                                                          |                                                                                     |                           |  |  |  |  |  |  |  |
|                                     |                                                                                                              |                                                                                                                                                                                                                                                          |                                                                                     |                           |  |  |  |  |  |  |  |
| 9                                   | Participation on a Data Safety Monitoring Board or Advisory Board                                            | <input checked="" type="checkbox"/> None<br><table border="1"> <tr> <td></td> <td></td> </tr> <tr> <td></td> <td></td> </tr> <tr> <td></td> <td></td> </tr> </table>                                                                                     |                                                                                     |                           |  |  |  |  |  |  |  |
|                                     |                                                                                                              |                                                                                                                                                                                                                                                          |                                                                                     |                           |  |  |  |  |  |  |  |
|                                     |                                                                                                              |                                                                                                                                                                                                                                                          |                                                                                     |                           |  |  |  |  |  |  |  |
|                                     |                                                                                                              |                                                                                                                                                                                                                                                          |                                                                                     |                           |  |  |  |  |  |  |  |
| 10                                  | Leadership or fiduciary role in other board, society, committee or advocacy group, paid or unpaid            | <input checked="" type="checkbox"/> None<br><table border="1"> <tr> <td></td> <td></td> </tr> <tr> <td></td> <td></td> </tr> <tr> <td></td> <td></td> </tr> </table>                                                                                     |                                                                                     |                           |  |  |  |  |  |  |  |
|                                     |                                                                                                              |                                                                                                                                                                                                                                                          |                                                                                     |                           |  |  |  |  |  |  |  |
|                                     |                                                                                                              |                                                                                                                                                                                                                                                          |                                                                                     |                           |  |  |  |  |  |  |  |
|                                     |                                                                                                              |                                                                                                                                                                                                                                                          |                                                                                     |                           |  |  |  |  |  |  |  |

|    |                                                                                  | Name all entities with whom you have this relationship or indicate none (add rows as needed)                                                         | Specifications/Comments (e.g., if payments were made to you or to your institution) |  |  |  |  |  |  |
|----|----------------------------------------------------------------------------------|------------------------------------------------------------------------------------------------------------------------------------------------------|-------------------------------------------------------------------------------------|--|--|--|--|--|--|
| 11 | Stock or stock options                                                           | <div><input checked="" type="checkbox"/> None</div> <table><tr><td></td><td></td></tr><tr><td></td><td></td></tr><tr><td></td><td></td></tr></table> |                                                                                     |  |  |  |  |  |  |
|    |                                                                                  |                                                                                                                                                      |                                                                                     |  |  |  |  |  |  |
|    |                                                                                  |                                                                                                                                                      |                                                                                     |  |  |  |  |  |  |
|    |                                                                                  |                                                                                                                                                      |                                                                                     |  |  |  |  |  |  |
| 12 | Receipt of equipment, materials, drugs, medical writing, gifts or other services | <div><input checked="" type="checkbox"/> None</div> <table><tr><td></td><td></td></tr><tr><td></td><td></td></tr><tr><td></td><td></td></tr></table> |                                                                                     |  |  |  |  |  |  |
|    |                                                                                  |                                                                                                                                                      |                                                                                     |  |  |  |  |  |  |
|    |                                                                                  |                                                                                                                                                      |                                                                                     |  |  |  |  |  |  |
|    |                                                                                  |                                                                                                                                                      |                                                                                     |  |  |  |  |  |  |
| 13 | Other financial or non-financial interests                                       | <div><input checked="" type="checkbox"/> None</div> <table><tr><td></td><td></td></tr><tr><td></td><td></td></tr><tr><td></td><td></td></tr></table> |                                                                                     |  |  |  |  |  |  |
|    |                                                                                  |                                                                                                                                                      |                                                                                     |  |  |  |  |  |  |
|    |                                                                                  |                                                                                                                                                      |                                                                                     |  |  |  |  |  |  |
|    |                                                                                  |                                                                                                                                                      |                                                                                     |  |  |  |  |  |  |

Please place an "X" next to the following statement to indicate your agreement:

☒ I certify that I have answered every question and have not altered the wording of any of the questions on this form.

## ICMJE DISCLOSURE FORM

**Date:** 9/11/2021

**Your Name:** BARREAU XAVIER

**Manuscript Title:** Aneurysm treatment with WEB in the combined population of two prospective, multicenter series: 5-year follow-up

**Manuscript Number (if known):** [Click or tap here to enter text.](#)

In the interest of transparency, we ask you to disclose all relationships/activities/interests listed below that are related to the content of your manuscript. "Related" means any relation with for-profit or not-for-profit third parties whose interests may be affected by the content of the manuscript. Disclosure represents a commitment to transparency and does not necessarily indicate a bias. If you are in doubt about whether to list a relationship/activity/interest, it is preferable that you do so.

The author's relationships/activities/interests should be defined broadly. For example, if your manuscript pertains to the epidemiology of hypertension, you should declare all relationships with manufacturers of antihypertensive medication, even if that medication is not mentioned in the manuscript.

In item #1 below, report all support for the work reported in this manuscript without time limit. For all other items, the time frame for disclosure is the past 36 months.

|                                                           | Name all entities with whom you have this relationship or indicate none (add rows as needed)                                                                                   | Specifications/Comments (e.g., if payments were made to you or to your institution)                                                                                                                          |  |  |  |  |  |  |
|-----------------------------------------------------------|--------------------------------------------------------------------------------------------------------------------------------------------------------------------------------|--------------------------------------------------------------------------------------------------------------------------------------------------------------------------------------------------------------|--|--|--|--|--|--|
| <b>Time frame: Since the initial planning of the work</b> |                                                                                                                                                                                |                                                                                                                                                                                                              |  |  |  |  |  |  |
| <b>1</b>                                                  | All support for the present manuscript (e.g., funding, provision of study materials, medical writing, article processing charges, etc.)<br><b>No time limit for this item.</b> | <input checked="" type="checkbox"/> <b>None</b><br><table border="1"> <tr><td></td><td></td></tr> <tr><td></td><td></td></tr> <tr><td></td><td></td></tr> </table> Click the tab key to add additional rows. |  |  |  |  |  |  |
|                                                           |                                                                                                                                                                                |                                                                                                                                                                                                              |  |  |  |  |  |  |
|                                                           |                                                                                                                                                                                |                                                                                                                                                                                                              |  |  |  |  |  |  |
|                                                           |                                                                                                                                                                                |                                                                                                                                                                                                              |  |  |  |  |  |  |
| <b>Time frame: past 36 months</b>                         |                                                                                                                                                                                |                                                                                                                                                                                                              |  |  |  |  |  |  |
| <b>2</b>                                                  | Grants or contracts from any entity (if not indicated in item #1 above).                                                                                                       | <input checked="" type="checkbox"/> <b>None</b><br><table border="1"> <tr><td></td><td></td></tr> <tr><td></td><td></td></tr> <tr><td></td><td></td></tr> </table>                                           |  |  |  |  |  |  |
|                                                           |                                                                                                                                                                                |                                                                                                                                                                                                              |  |  |  |  |  |  |
|                                                           |                                                                                                                                                                                |                                                                                                                                                                                                              |  |  |  |  |  |  |
|                                                           |                                                                                                                                                                                |                                                                                                                                                                                                              |  |  |  |  |  |  |
| <b>3</b>                                                  | Royalties or licenses                                                                                                                                                          | <input checked="" type="checkbox"/> <b>None</b><br><table border="1"> <tr><td></td><td></td></tr> <tr><td></td><td></td></tr> <tr><td></td><td></td></tr> </table>                                           |  |  |  |  |  |  |
|                                                           |                                                                                                                                                                                |                                                                                                                                                                                                              |  |  |  |  |  |  |
|                                                           |                                                                                                                                                                                |                                                                                                                                                                                                              |  |  |  |  |  |  |
|                                                           |                                                                                                                                                                                |                                                                                                                                                                                                              |  |  |  |  |  |  |

|                 |                                                                                                              | Name all entities with whom you have this relationship or indicate none (add rows as needed)                                                                                                                  | Specifications/Comments (e.g., if payments were made to you or to your institution) |        |  |  |  |  |  |  |  |
|-----------------|--------------------------------------------------------------------------------------------------------------|---------------------------------------------------------------------------------------------------------------------------------------------------------------------------------------------------------------|-------------------------------------------------------------------------------------|--------|--|--|--|--|--|--|--|
| 4               | Consulting fees                                                                                              | <input type="checkbox"/> None<br><table border="1"> <tr> <td>SEQUENT medical</td> <td>myself</td> </tr> <tr> <td></td> <td></td> </tr> <tr> <td></td> <td></td> </tr> <tr> <td></td> <td></td> </tr> </table> | SEQUENT medical                                                                     | myself |  |  |  |  |  |  |  |
| SEQUENT medical | myself                                                                                                       |                                                                                                                                                                                                               |                                                                                     |        |  |  |  |  |  |  |  |
|                 |                                                                                                              |                                                                                                                                                                                                               |                                                                                     |        |  |  |  |  |  |  |  |
|                 |                                                                                                              |                                                                                                                                                                                                               |                                                                                     |        |  |  |  |  |  |  |  |
|                 |                                                                                                              |                                                                                                                                                                                                               |                                                                                     |        |  |  |  |  |  |  |  |
| 5               | Payment or honoraria for lectures, presentations, speakers bureaus, manuscript writing or educational events | <input type="checkbox"/> None<br><table border="1"> <tr> <td>SEQUENT</td> <td>myself</td> </tr> <tr> <td></td> <td></td> </tr> <tr> <td></td> <td></td> </tr> </table>                                        | SEQUENT                                                                             | myself |  |  |  |  |  |  |  |
| SEQUENT         | myself                                                                                                       |                                                                                                                                                                                                               |                                                                                     |        |  |  |  |  |  |  |  |
|                 |                                                                                                              |                                                                                                                                                                                                               |                                                                                     |        |  |  |  |  |  |  |  |
|                 |                                                                                                              |                                                                                                                                                                                                               |                                                                                     |        |  |  |  |  |  |  |  |
| 6               | Payment for expert testimony                                                                                 | <input type="checkbox"/> None<br><table border="1"> <tr> <td></td> <td></td> </tr> <tr> <td></td> <td></td> </tr> <tr> <td></td> <td></td> </tr> </table>                                                     |                                                                                     |        |  |  |  |  |  |  |  |
|                 |                                                                                                              |                                                                                                                                                                                                               |                                                                                     |        |  |  |  |  |  |  |  |
|                 |                                                                                                              |                                                                                                                                                                                                               |                                                                                     |        |  |  |  |  |  |  |  |
|                 |                                                                                                              |                                                                                                                                                                                                               |                                                                                     |        |  |  |  |  |  |  |  |
| 7               | Support for attending meetings and/or travel                                                                 | <input checked="" type="checkbox"/> None<br><table border="1"> <tr> <td></td> <td></td> </tr> <tr> <td></td> <td></td> </tr> <tr> <td></td> <td></td> </tr> </table>                                          |                                                                                     |        |  |  |  |  |  |  |  |
|                 |                                                                                                              |                                                                                                                                                                                                               |                                                                                     |        |  |  |  |  |  |  |  |
|                 |                                                                                                              |                                                                                                                                                                                                               |                                                                                     |        |  |  |  |  |  |  |  |
|                 |                                                                                                              |                                                                                                                                                                                                               |                                                                                     |        |  |  |  |  |  |  |  |
| 8               | Patents planned, issued or pending                                                                           | <input checked="" type="checkbox"/> None<br><table border="1"> <tr> <td></td> <td></td> </tr> <tr> <td></td> <td></td> </tr> <tr> <td></td> <td></td> </tr> </table>                                          |                                                                                     |        |  |  |  |  |  |  |  |
|                 |                                                                                                              |                                                                                                                                                                                                               |                                                                                     |        |  |  |  |  |  |  |  |
|                 |                                                                                                              |                                                                                                                                                                                                               |                                                                                     |        |  |  |  |  |  |  |  |
|                 |                                                                                                              |                                                                                                                                                                                                               |                                                                                     |        |  |  |  |  |  |  |  |
| 9               | Participation on a Data Safety Monitoring Board or Advisory Board                                            | <input checked="" type="checkbox"/> None<br><table border="1"> <tr> <td></td> <td></td> </tr> <tr> <td></td> <td></td> </tr> <tr> <td></td> <td></td> </tr> </table>                                          |                                                                                     |        |  |  |  |  |  |  |  |
|                 |                                                                                                              |                                                                                                                                                                                                               |                                                                                     |        |  |  |  |  |  |  |  |
|                 |                                                                                                              |                                                                                                                                                                                                               |                                                                                     |        |  |  |  |  |  |  |  |
|                 |                                                                                                              |                                                                                                                                                                                                               |                                                                                     |        |  |  |  |  |  |  |  |
| 10              | Leadership or fiduciary role in other board, society, committee or advocacy group, paid or unpaid            | <input checked="" type="checkbox"/> None<br><table border="1"> <tr> <td></td> <td></td> </tr> <tr> <td></td> <td></td> </tr> <tr> <td></td> <td></td> </tr> </table>                                          |                                                                                     |        |  |  |  |  |  |  |  |
|                 |                                                                                                              |                                                                                                                                                                                                               |                                                                                     |        |  |  |  |  |  |  |  |
|                 |                                                                                                              |                                                                                                                                                                                                               |                                                                                     |        |  |  |  |  |  |  |  |
|                 |                                                                                                              |                                                                                                                                                                                                               |                                                                                     |        |  |  |  |  |  |  |  |

|    |                                                                                  | Name all entities with whom you have this relationship or indicate none (add rows as needed)                                                         | Specifications/Comments (e.g., if payments were made to you or to your institution) |  |  |  |  |  |  |
|----|----------------------------------------------------------------------------------|------------------------------------------------------------------------------------------------------------------------------------------------------|-------------------------------------------------------------------------------------|--|--|--|--|--|--|
| 11 | Stock or stock options                                                           | <div><input checked="" type="checkbox"/> None</div> <table><tr><td></td><td></td></tr><tr><td></td><td></td></tr><tr><td></td><td></td></tr></table> |                                                                                     |  |  |  |  |  |  |
|    |                                                                                  |                                                                                                                                                      |                                                                                     |  |  |  |  |  |  |
|    |                                                                                  |                                                                                                                                                      |                                                                                     |  |  |  |  |  |  |
|    |                                                                                  |                                                                                                                                                      |                                                                                     |  |  |  |  |  |  |
| 12 | Receipt of equipment, materials, drugs, medical writing, gifts or other services | <div><input checked="" type="checkbox"/> None</div> <table><tr><td></td><td></td></tr><tr><td></td><td></td></tr><tr><td></td><td></td></tr></table> |                                                                                     |  |  |  |  |  |  |
|    |                                                                                  |                                                                                                                                                      |                                                                                     |  |  |  |  |  |  |
|    |                                                                                  |                                                                                                                                                      |                                                                                     |  |  |  |  |  |  |
|    |                                                                                  |                                                                                                                                                      |                                                                                     |  |  |  |  |  |  |
| 13 | Other financial or non-financial interests                                       | <div><input checked="" type="checkbox"/> None</div> <table><tr><td></td><td></td></tr><tr><td></td><td></td></tr><tr><td></td><td></td></tr></table> |                                                                                     |  |  |  |  |  |  |
|    |                                                                                  |                                                                                                                                                      |                                                                                     |  |  |  |  |  |  |
|    |                                                                                  |                                                                                                                                                      |                                                                                     |  |  |  |  |  |  |
|    |                                                                                  |                                                                                                                                                      |                                                                                     |  |  |  |  |  |  |

Please place an "X" next to the following statement to indicate your agreement:

☒ I certify that I have answered every question and have not altered the wording of any of the questions on this form.



## ICMJE DISCLOSURE FORM

**Date:** 11/10/2021

**Your Name:** Joachim Berkefeld

**Manuscript Title:** Aneurysm treatment with WEB in the combined population of two prospective, multicenter series: 5-year follow-up

**Manuscript Number (if known):** [Click or tap here to enter text.](#)

In the interest of transparency, we ask you to disclose all relationships/activities/interests listed below that are related to the content of your manuscript. "Related" means any relation with for-profit or not-for-profit third parties whose interests may be affected by the content of the manuscript. Disclosure represents a commitment to transparency and does not necessarily indicate a bias. If you are in doubt about whether to list a relationship/activity/interest, it is preferable that you do so.

The author's relationships/activities/interests should be defined broadly. For example, if your manuscript pertains to the epidemiology of hypertension, you should declare all relationships with manufacturers of antihypertensive medication, even if that medication is not mentioned in the manuscript.

In item #1 below, report all support for the work reported in this manuscript without time limit. For all other items, the time frame for disclosure is the past 36 months.

|                                                           | Name all entities with whom you have this relationship or indicate none (add rows as needed)                                                                                   | Specifications/Comments (e.g., if payments were made to you or to your institution)                                                                                                                          |  |  |  |  |  |  |
|-----------------------------------------------------------|--------------------------------------------------------------------------------------------------------------------------------------------------------------------------------|--------------------------------------------------------------------------------------------------------------------------------------------------------------------------------------------------------------|--|--|--|--|--|--|
| <b>Time frame: Since the initial planning of the work</b> |                                                                                                                                                                                |                                                                                                                                                                                                              |  |  |  |  |  |  |
| <b>1</b>                                                  | All support for the present manuscript (e.g., funding, provision of study materials, medical writing, article processing charges, etc.)<br><b>No time limit for this item.</b> | <input checked="" type="checkbox"/> <b>None</b><br><table border="1"> <tr><td></td><td></td></tr> <tr><td></td><td></td></tr> <tr><td></td><td></td></tr> </table> Click the tab key to add additional rows. |  |  |  |  |  |  |
|                                                           |                                                                                                                                                                                |                                                                                                                                                                                                              |  |  |  |  |  |  |
|                                                           |                                                                                                                                                                                |                                                                                                                                                                                                              |  |  |  |  |  |  |
|                                                           |                                                                                                                                                                                |                                                                                                                                                                                                              |  |  |  |  |  |  |
| <b>Time frame: past 36 months</b>                         |                                                                                                                                                                                |                                                                                                                                                                                                              |  |  |  |  |  |  |
| <b>2</b>                                                  | Grants or contracts from any entity (if not indicated in item #1 above).                                                                                                       | <input checked="" type="checkbox"/> <b>None</b><br><table border="1"> <tr><td></td><td></td></tr> <tr><td></td><td></td></tr> <tr><td></td><td></td></tr> </table>                                           |  |  |  |  |  |  |
|                                                           |                                                                                                                                                                                |                                                                                                                                                                                                              |  |  |  |  |  |  |
|                                                           |                                                                                                                                                                                |                                                                                                                                                                                                              |  |  |  |  |  |  |
|                                                           |                                                                                                                                                                                |                                                                                                                                                                                                              |  |  |  |  |  |  |
| <b>3</b>                                                  | Royalties or licenses                                                                                                                                                          | <input checked="" type="checkbox"/> <b>None</b><br><table border="1"> <tr><td></td><td></td></tr> <tr><td></td><td></td></tr> <tr><td></td><td></td></tr> </table>                                           |  |  |  |  |  |  |
|                                                           |                                                                                                                                                                                |                                                                                                                                                                                                              |  |  |  |  |  |  |
|                                                           |                                                                                                                                                                                |                                                                                                                                                                                                              |  |  |  |  |  |  |
|                                                           |                                                                                                                                                                                |                                                                                                                                                                                                              |  |  |  |  |  |  |

|                                                                            |                                                                                                              | Name all entities with whom you have this relationship or indicate none (add rows as needed)                                                                                                                                                                                                                 | Specifications/Comments (e.g., if payments were made to you or to your institution) |                                                                            |                                               |  |  |  |  |  |  |
|----------------------------------------------------------------------------|--------------------------------------------------------------------------------------------------------------|--------------------------------------------------------------------------------------------------------------------------------------------------------------------------------------------------------------------------------------------------------------------------------------------------------------|-------------------------------------------------------------------------------------|----------------------------------------------------------------------------|-----------------------------------------------|--|--|--|--|--|--|
| 4                                                                          | Consulting fees                                                                                              | <input type="checkbox"/> None<br><table border="1"> <tr> <td>Scientific cooperation with Siemens regarding time resolved 3D-Angiography</td> <td>Payments to my institution, no personal fees.</td> </tr> <tr><td> </td><td> </td></tr> <tr><td> </td><td> </td></tr> <tr><td> </td><td> </td></tr> </table> |                                                                                     | Scientific cooperation with Siemens regarding time resolved 3D-Angiography | Payments to my institution, no personal fees. |  |  |  |  |  |  |
| Scientific cooperation with Siemens regarding time resolved 3D-Angiography | Payments to my institution, no personal fees.                                                                |                                                                                                                                                                                                                                                                                                              |                                                                                     |                                                                            |                                               |  |  |  |  |  |  |
|                                                                            |                                                                                                              |                                                                                                                                                                                                                                                                                                              |                                                                                     |                                                                            |                                               |  |  |  |  |  |  |
|                                                                            |                                                                                                              |                                                                                                                                                                                                                                                                                                              |                                                                                     |                                                                            |                                               |  |  |  |  |  |  |
|                                                                            |                                                                                                              |                                                                                                                                                                                                                                                                                                              |                                                                                     |                                                                            |                                               |  |  |  |  |  |  |
| 5                                                                          | Payment or honoraria for lectures, presentations, speakers bureaus, manuscript writing or educational events | <input checked="" type="checkbox"/> None<br><table border="1"> <tr><td> </td><td> </td></tr> <tr><td> </td><td> </td></tr> <tr><td> </td><td> </td></tr> </table>                                                                                                                                            |                                                                                     |                                                                            |                                               |  |  |  |  |  |  |
|                                                                            |                                                                                                              |                                                                                                                                                                                                                                                                                                              |                                                                                     |                                                                            |                                               |  |  |  |  |  |  |
|                                                                            |                                                                                                              |                                                                                                                                                                                                                                                                                                              |                                                                                     |                                                                            |                                               |  |  |  |  |  |  |
|                                                                            |                                                                                                              |                                                                                                                                                                                                                                                                                                              |                                                                                     |                                                                            |                                               |  |  |  |  |  |  |
| 6                                                                          | Payment for expert testimony                                                                                 | <input checked="" type="checkbox"/> None<br><table border="1"> <tr><td> </td><td> </td></tr> <tr><td> </td><td> </td></tr> <tr><td> </td><td> </td></tr> </table>                                                                                                                                            |                                                                                     |                                                                            |                                               |  |  |  |  |  |  |
|                                                                            |                                                                                                              |                                                                                                                                                                                                                                                                                                              |                                                                                     |                                                                            |                                               |  |  |  |  |  |  |
|                                                                            |                                                                                                              |                                                                                                                                                                                                                                                                                                              |                                                                                     |                                                                            |                                               |  |  |  |  |  |  |
|                                                                            |                                                                                                              |                                                                                                                                                                                                                                                                                                              |                                                                                     |                                                                            |                                               |  |  |  |  |  |  |
| 7                                                                          | Support for attending meetings and/or travel                                                                 | <input checked="" type="checkbox"/> None<br><table border="1"> <tr><td> </td><td> </td></tr> <tr><td> </td><td> </td></tr> <tr><td> </td><td> </td></tr> </table>                                                                                                                                            |                                                                                     |                                                                            |                                               |  |  |  |  |  |  |
|                                                                            |                                                                                                              |                                                                                                                                                                                                                                                                                                              |                                                                                     |                                                                            |                                               |  |  |  |  |  |  |
|                                                                            |                                                                                                              |                                                                                                                                                                                                                                                                                                              |                                                                                     |                                                                            |                                               |  |  |  |  |  |  |
|                                                                            |                                                                                                              |                                                                                                                                                                                                                                                                                                              |                                                                                     |                                                                            |                                               |  |  |  |  |  |  |
| 8                                                                          | Patents planned, issued or pending                                                                           | <input checked="" type="checkbox"/> None<br><table border="1"> <tr><td> </td><td> </td></tr> <tr><td> </td><td> </td></tr> <tr><td> </td><td> </td></tr> </table>                                                                                                                                            |                                                                                     |                                                                            |                                               |  |  |  |  |  |  |
|                                                                            |                                                                                                              |                                                                                                                                                                                                                                                                                                              |                                                                                     |                                                                            |                                               |  |  |  |  |  |  |
|                                                                            |                                                                                                              |                                                                                                                                                                                                                                                                                                              |                                                                                     |                                                                            |                                               |  |  |  |  |  |  |
|                                                                            |                                                                                                              |                                                                                                                                                                                                                                                                                                              |                                                                                     |                                                                            |                                               |  |  |  |  |  |  |
| 9                                                                          | Participation on a Data Safety Monitoring Board or Advisory Board                                            | <input checked="" type="checkbox"/> None<br><table border="1"> <tr><td> </td><td> </td></tr> <tr><td> </td><td> </td></tr> <tr><td> </td><td> </td></tr> </table>                                                                                                                                            |                                                                                     |                                                                            |                                               |  |  |  |  |  |  |
|                                                                            |                                                                                                              |                                                                                                                                                                                                                                                                                                              |                                                                                     |                                                                            |                                               |  |  |  |  |  |  |
|                                                                            |                                                                                                              |                                                                                                                                                                                                                                                                                                              |                                                                                     |                                                                            |                                               |  |  |  |  |  |  |
|                                                                            |                                                                                                              |                                                                                                                                                                                                                                                                                                              |                                                                                     |                                                                            |                                               |  |  |  |  |  |  |
| 10                                                                         | Leadership or fiduciary role in other board, society, committee or advocacy group, paid or unpaid            | <input checked="" type="checkbox"/> None<br><table border="1"> <tr><td> </td><td> </td></tr> <tr><td> </td><td> </td></tr> <tr><td> </td><td> </td></tr> </table>                                                                                                                                            |                                                                                     |                                                                            |                                               |  |  |  |  |  |  |
|                                                                            |                                                                                                              |                                                                                                                                                                                                                                                                                                              |                                                                                     |                                                                            |                                               |  |  |  |  |  |  |
|                                                                            |                                                                                                              |                                                                                                                                                                                                                                                                                                              |                                                                                     |                                                                            |                                               |  |  |  |  |  |  |
|                                                                            |                                                                                                              |                                                                                                                                                                                                                                                                                                              |                                                                                     |                                                                            |                                               |  |  |  |  |  |  |

|    |                                                                                  | Name all entities with whom you have this relationship or indicate none (add rows as needed)                                                                | Specifications/Comments (e.g., if payments were made to you or to your institution) |  |  |  |  |  |  |
|----|----------------------------------------------------------------------------------|-------------------------------------------------------------------------------------------------------------------------------------------------------------|-------------------------------------------------------------------------------------|--|--|--|--|--|--|
| 11 | Stock or stock options                                                           | <input checked="" type="checkbox"/> None<br><table border="1"> <tr><td></td><td></td></tr> <tr><td></td><td></td></tr> <tr><td></td><td></td></tr> </table> |                                                                                     |  |  |  |  |  |  |
|    |                                                                                  |                                                                                                                                                             |                                                                                     |  |  |  |  |  |  |
|    |                                                                                  |                                                                                                                                                             |                                                                                     |  |  |  |  |  |  |
|    |                                                                                  |                                                                                                                                                             |                                                                                     |  |  |  |  |  |  |
| 12 | Receipt of equipment, materials, drugs, medical writing, gifts or other services | <input checked="" type="checkbox"/> None<br><table border="1"> <tr><td></td><td></td></tr> <tr><td></td><td></td></tr> <tr><td></td><td></td></tr> </table> |                                                                                     |  |  |  |  |  |  |
|    |                                                                                  |                                                                                                                                                             |                                                                                     |  |  |  |  |  |  |
|    |                                                                                  |                                                                                                                                                             |                                                                                     |  |  |  |  |  |  |
|    |                                                                                  |                                                                                                                                                             |                                                                                     |  |  |  |  |  |  |
| 13 | Other financial or non-financial interests                                       | <input checked="" type="checkbox"/> None<br><table border="1"> <tr><td></td><td></td></tr> <tr><td></td><td></td></tr> <tr><td></td><td></td></tr> </table> |                                                                                     |  |  |  |  |  |  |
|    |                                                                                  |                                                                                                                                                             |                                                                                     |  |  |  |  |  |  |
|    |                                                                                  |                                                                                                                                                             |                                                                                     |  |  |  |  |  |  |
|    |                                                                                  |                                                                                                                                                             |                                                                                     |  |  |  |  |  |  |

**Please place an "X" next to the following statement to indicate your agreement:**

☒ I certify that I have answered every question and have not altered the wording of any of the questions on this form.

## ICMJE DISCLOSURE FORM

**Date:** 1/7/2022

**Your Name:** Markus Holtmannspötter

**Manuscript Title:** Aneurysm treatment with WEB in the combined population of two prospective, multicenter series: 5-year follow-up

**Manuscript Number (if known):** Neurintsurg-2021-018414

In the interest of transparency, we ask you to disclose all relationships/activities/interests listed below that are related to the content of your manuscript. "Related" means any relation with for-profit or not-for-profit third parties whose interests may be affected by the content of the manuscript. Disclosure represents a commitment to transparency and does not necessarily indicate a bias. If you are in doubt about whether to list a relationship/activity/interest, it is preferable that you do so.

The author's relationships/activities/interests should be defined broadly. For example, if your manuscript pertains to the epidemiology of hypertension, you should declare all relationships with manufacturers of antihypertensive medication, even if that medication is not mentioned in the manuscript.

In item #1 below, report all support for the work reported in this manuscript without time limit. For all other items, the time frame for disclosure is the past 36 months.

|                                                           | Name all entities with whom you have this relationship or indicate none (add rows as needed)                                                                                   | Specifications/Comments (e.g., if payments were made to you or to your institution)                                                                                                                          |  |  |  |  |  |  |
|-----------------------------------------------------------|--------------------------------------------------------------------------------------------------------------------------------------------------------------------------------|--------------------------------------------------------------------------------------------------------------------------------------------------------------------------------------------------------------|--|--|--|--|--|--|
| <b>Time frame: Since the initial planning of the work</b> |                                                                                                                                                                                |                                                                                                                                                                                                              |  |  |  |  |  |  |
| <b>1</b>                                                  | All support for the present manuscript (e.g., funding, provision of study materials, medical writing, article processing charges, etc.)<br><b>No time limit for this item.</b> | <input checked="" type="checkbox"/> <b>None</b><br><table border="1"> <tr><td></td><td></td></tr> <tr><td></td><td></td></tr> <tr><td></td><td></td></tr> </table> Click the tab key to add additional rows. |  |  |  |  |  |  |
|                                                           |                                                                                                                                                                                |                                                                                                                                                                                                              |  |  |  |  |  |  |
|                                                           |                                                                                                                                                                                |                                                                                                                                                                                                              |  |  |  |  |  |  |
|                                                           |                                                                                                                                                                                |                                                                                                                                                                                                              |  |  |  |  |  |  |
| <b>Time frame: past 36 months</b>                         |                                                                                                                                                                                |                                                                                                                                                                                                              |  |  |  |  |  |  |
| <b>2</b>                                                  | Grants or contracts from any entity (if not indicated in item #1 above).                                                                                                       | <input checked="" type="checkbox"/> <b>None</b><br><table border="1"> <tr><td></td><td></td></tr> <tr><td></td><td></td></tr> <tr><td></td><td></td></tr> </table>                                           |  |  |  |  |  |  |
|                                                           |                                                                                                                                                                                |                                                                                                                                                                                                              |  |  |  |  |  |  |
|                                                           |                                                                                                                                                                                |                                                                                                                                                                                                              |  |  |  |  |  |  |
|                                                           |                                                                                                                                                                                |                                                                                                                                                                                                              |  |  |  |  |  |  |
| <b>3</b>                                                  | Royalties or licenses                                                                                                                                                          | <input checked="" type="checkbox"/> <b>None</b><br><table border="1"> <tr><td></td><td></td></tr> <tr><td></td><td></td></tr> <tr><td></td><td></td></tr> </table>                                           |  |  |  |  |  |  |
|                                                           |                                                                                                                                                                                |                                                                                                                                                                                                              |  |  |  |  |  |  |
|                                                           |                                                                                                                                                                                |                                                                                                                                                                                                              |  |  |  |  |  |  |
|                                                           |                                                                                                                                                                                |                                                                                                                                                                                                              |  |  |  |  |  |  |

|    |                                                                                                              | Name all entities with whom you have this relationship or indicate none (add rows as needed) | Specifications/Comments (e.g., if payments were made to you or to your institution) |
|----|--------------------------------------------------------------------------------------------------------------|----------------------------------------------------------------------------------------------|-------------------------------------------------------------------------------------|
| 4  | Consulting fees                                                                                              | <input checked="" type="checkbox"/> <b>None</b>                                              |                                                                                     |
|    |                                                                                                              | Balt                                                                                         | Proctoring and Consulting                                                           |
|    |                                                                                                              | Stryker                                                                                      | Proctoring and Consulting                                                           |
|    |                                                                                                              | Medtronic                                                                                    | Proctoring and Consulting                                                           |
|    |                                                                                                              | Microvention                                                                                 | Proctoring and Consulting                                                           |
|    |                                                                                                              | Phenox                                                                                       | Proctoring and Consulting                                                           |
| 5  | Payment or honoraria for lectures, presentations, speakers bureaus, manuscript writing or educational events | <input type="checkbox"/> <b>None</b>                                                         |                                                                                     |
|    |                                                                                                              | Cerenovus                                                                                    | Presentations                                                                       |
|    |                                                                                                              | Phenox                                                                                       | Presentations                                                                       |
|    |                                                                                                              | Stryker                                                                                      | Presentations                                                                       |
|    |                                                                                                              | Microvention                                                                                 | Presentations                                                                       |
|    |                                                                                                              | Cerus medical                                                                                | Presentations                                                                       |
| 6  | Payment for expert testimony                                                                                 | <input checked="" type="checkbox"/> <b>None</b>                                              |                                                                                     |
|    |                                                                                                              |                                                                                              |                                                                                     |
|    |                                                                                                              |                                                                                              |                                                                                     |
|    |                                                                                                              |                                                                                              |                                                                                     |
| 7  | Support for attending meetings and/or travel                                                                 | <input checked="" type="checkbox"/> <b>None</b>                                              |                                                                                     |
|    |                                                                                                              |                                                                                              |                                                                                     |
|    |                                                                                                              |                                                                                              |                                                                                     |
|    |                                                                                                              |                                                                                              |                                                                                     |
| 8  | Patents planned, issued or pending                                                                           | <input checked="" type="checkbox"/> <b>None</b>                                              |                                                                                     |
|    |                                                                                                              |                                                                                              |                                                                                     |
|    |                                                                                                              |                                                                                              |                                                                                     |
|    |                                                                                                              |                                                                                              |                                                                                     |
| 9  | Participation on a Data Safety Monitoring Board or Advisory Board                                            | <input checked="" type="checkbox"/> <b>None</b>                                              |                                                                                     |
|    |                                                                                                              |                                                                                              |                                                                                     |
|    |                                                                                                              |                                                                                              |                                                                                     |
|    |                                                                                                              |                                                                                              |                                                                                     |
| 10 | Leadership or fiduciary role in other board, society, committee or advocacy group, paid or unpaid            | <input checked="" type="checkbox"/> <b>None</b>                                              |                                                                                     |
|    |                                                                                                              |                                                                                              |                                                                                     |
|    |                                                                                                              |                                                                                              |                                                                                     |
|    |                                                                                                              |                                                                                              |                                                                                     |

|                                                                                                                                                                                                                                                               |                                                                                  | Name all entities with whom you have this relationship or indicate none (add rows as needed)                                                                                                    | Specifications/Comments (e.g., if payments were made to you or to your institution) |  |  |  |  |  |  |
|---------------------------------------------------------------------------------------------------------------------------------------------------------------------------------------------------------------------------------------------------------------|----------------------------------------------------------------------------------|-------------------------------------------------------------------------------------------------------------------------------------------------------------------------------------------------|-------------------------------------------------------------------------------------|--|--|--|--|--|--|
| <b>11</b>                                                                                                                                                                                                                                                     | Stock or stock options                                                           | <input checked="" type="checkbox"/> <b>None</b><br><table border="1" data-bbox="415 342 1435 434"> <tr><td></td><td></td></tr> <tr><td></td><td></td></tr> <tr><td></td><td></td></tr> </table> |                                                                                     |  |  |  |  |  |  |
|                                                                                                                                                                                                                                                               |                                                                                  |                                                                                                                                                                                                 |                                                                                     |  |  |  |  |  |  |
|                                                                                                                                                                                                                                                               |                                                                                  |                                                                                                                                                                                                 |                                                                                     |  |  |  |  |  |  |
|                                                                                                                                                                                                                                                               |                                                                                  |                                                                                                                                                                                                 |                                                                                     |  |  |  |  |  |  |
| <b>12</b>                                                                                                                                                                                                                                                     | Receipt of equipment, materials, drugs, medical writing, gifts or other services | <input checked="" type="checkbox"/> <b>None</b><br><table border="1" data-bbox="415 537 1435 630"> <tr><td></td><td></td></tr> <tr><td></td><td></td></tr> <tr><td></td><td></td></tr> </table> |                                                                                     |  |  |  |  |  |  |
|                                                                                                                                                                                                                                                               |                                                                                  |                                                                                                                                                                                                 |                                                                                     |  |  |  |  |  |  |
|                                                                                                                                                                                                                                                               |                                                                                  |                                                                                                                                                                                                 |                                                                                     |  |  |  |  |  |  |
|                                                                                                                                                                                                                                                               |                                                                                  |                                                                                                                                                                                                 |                                                                                     |  |  |  |  |  |  |
| <b>13</b>                                                                                                                                                                                                                                                     | Other financial or non-financial interests                                       | <input checked="" type="checkbox"/> <b>None</b><br><table border="1" data-bbox="415 730 1435 823"> <tr><td></td><td></td></tr> <tr><td></td><td></td></tr> <tr><td></td><td></td></tr> </table> |                                                                                     |  |  |  |  |  |  |
|                                                                                                                                                                                                                                                               |                                                                                  |                                                                                                                                                                                                 |                                                                                     |  |  |  |  |  |  |
|                                                                                                                                                                                                                                                               |                                                                                  |                                                                                                                                                                                                 |                                                                                     |  |  |  |  |  |  |
|                                                                                                                                                                                                                                                               |                                                                                  |                                                                                                                                                                                                 |                                                                                     |  |  |  |  |  |  |
| <p><b>Please place an "X" next to the following statement to indicate your agreement:</b></p> <p><input checked="" type="checkbox"/> I certify that I have answered every question and have not altered the wording of any of the questions on this form.</p> |                                                                                  |                                                                                                                                                                                                 |                                                                                     |  |  |  |  |  |  |

## ICMJE DISCLOSURE FORM

**Date:** 1/7/2022

**Your Name:** Thomas Liebig

**Manuscript Title:** Aneurysm treatment with WEB in the combined population of two prospective, multicenter series: 5-year follow-up

**Manuscript Number (if known):** Neurintsurg-2021-018414

In the interest of transparency, we ask you to disclose all relationships/activities/interests listed below that are related to the content of your manuscript. "Related" means any relation with for-profit or not-for-profit third parties whose interests may be affected by the content of the manuscript. Disclosure represents a commitment to transparency and does not necessarily indicate a bias. If you are in doubt about whether to list a relationship/activity/interest, it is preferable that you do so.

The author's relationships/activities/interests should be defined broadly. For example, if your manuscript pertains to the epidemiology of hypertension, you should declare all relationships with manufacturers of antihypertensive medication, even if that medication is not mentioned in the manuscript.

In item #1 below, report all support for the work reported in this manuscript without time limit. For all other items, the time frame for disclosure is the past 36 months.

|                                                           | Name all entities with whom you have this relationship or indicate none (add rows as needed)                                                                                   | Specifications/Comments (e.g., if payments were made to you or to your institution)                                                                                                                          |  |  |  |  |  |  |
|-----------------------------------------------------------|--------------------------------------------------------------------------------------------------------------------------------------------------------------------------------|--------------------------------------------------------------------------------------------------------------------------------------------------------------------------------------------------------------|--|--|--|--|--|--|
| <b>Time frame: Since the initial planning of the work</b> |                                                                                                                                                                                |                                                                                                                                                                                                              |  |  |  |  |  |  |
| <b>1</b>                                                  | All support for the present manuscript (e.g., funding, provision of study materials, medical writing, article processing charges, etc.)<br><b>No time limit for this item.</b> | <input checked="" type="checkbox"/> <b>None</b><br><table border="1"> <tr><td></td><td></td></tr> <tr><td></td><td></td></tr> <tr><td></td><td></td></tr> </table> Click the tab key to add additional rows. |  |  |  |  |  |  |
|                                                           |                                                                                                                                                                                |                                                                                                                                                                                                              |  |  |  |  |  |  |
|                                                           |                                                                                                                                                                                |                                                                                                                                                                                                              |  |  |  |  |  |  |
|                                                           |                                                                                                                                                                                |                                                                                                                                                                                                              |  |  |  |  |  |  |
| <b>Time frame: past 36 months</b>                         |                                                                                                                                                                                |                                                                                                                                                                                                              |  |  |  |  |  |  |
| <b>2</b>                                                  | Grants or contracts from any entity (if not indicated in item #1 above).                                                                                                       | <input checked="" type="checkbox"/> <b>None</b><br><table border="1"> <tr><td></td><td></td></tr> <tr><td></td><td></td></tr> <tr><td></td><td></td></tr> </table>                                           |  |  |  |  |  |  |
|                                                           |                                                                                                                                                                                |                                                                                                                                                                                                              |  |  |  |  |  |  |
|                                                           |                                                                                                                                                                                |                                                                                                                                                                                                              |  |  |  |  |  |  |
|                                                           |                                                                                                                                                                                |                                                                                                                                                                                                              |  |  |  |  |  |  |
| <b>3</b>                                                  | Royalties or licenses                                                                                                                                                          | <input checked="" type="checkbox"/> <b>None</b><br><table border="1"> <tr><td></td><td></td></tr> <tr><td></td><td></td></tr> <tr><td></td><td></td></tr> </table>                                           |  |  |  |  |  |  |
|                                                           |                                                                                                                                                                                |                                                                                                                                                                                                              |  |  |  |  |  |  |
|                                                           |                                                                                                                                                                                |                                                                                                                                                                                                              |  |  |  |  |  |  |
|                                                           |                                                                                                                                                                                |                                                                                                                                                                                                              |  |  |  |  |  |  |



|                                        |                                                                                                              | Name all entities with whom you have this relationship or indicate none (add rows as needed)                                                                                                                                                                                                                                          | Specifications/Comments (e.g., if payments were made to you or to your institution) |                                                 |                    |                                           |  |  |  |  |  |
|----------------------------------------|--------------------------------------------------------------------------------------------------------------|---------------------------------------------------------------------------------------------------------------------------------------------------------------------------------------------------------------------------------------------------------------------------------------------------------------------------------------|-------------------------------------------------------------------------------------|-------------------------------------------------|--------------------|-------------------------------------------|--|--|--|--|--|
| 4                                      | Consulting fees                                                                                              | <input type="checkbox"/> None <table border="1"> <tr> <td>Microvention, formerly Sequent medical</td> <td>Service related fees and proctoring, paid to me</td> </tr> <tr> <td>Cerus Endovascular</td> <td>Service related fees and proctoring, paid</td> </tr> <tr> <td></td> <td></td> </tr> <tr> <td></td> <td></td> </tr> </table> | Microvention, formerly Sequent medical                                              | Service related fees and proctoring, paid to me | Cerus Endovascular | Service related fees and proctoring, paid |  |  |  |  |  |
| Microvention, formerly Sequent medical | Service related fees and proctoring, paid to me                                                              |                                                                                                                                                                                                                                                                                                                                       |                                                                                     |                                                 |                    |                                           |  |  |  |  |  |
| Cerus Endovascular                     | Service related fees and proctoring, paid                                                                    |                                                                                                                                                                                                                                                                                                                                       |                                                                                     |                                                 |                    |                                           |  |  |  |  |  |
|                                        |                                                                                                              |                                                                                                                                                                                                                                                                                                                                       |                                                                                     |                                                 |                    |                                           |  |  |  |  |  |
|                                        |                                                                                                              |                                                                                                                                                                                                                                                                                                                                       |                                                                                     |                                                 |                    |                                           |  |  |  |  |  |
| 5                                      | Payment or honoraria for lectures, presentations, speakers bureaus, manuscript writing or educational events | <input type="checkbox"/> None <table border="1"> <tr> <td>Stryker</td> <td>Lecture honoraria</td> </tr> <tr> <td>Cerus Endovascular</td> <td>Lecture honoraria</td> </tr> <tr> <td></td> <td></td> </tr> </table>                                                                                                                     | Stryker                                                                             | Lecture honoraria                               | Cerus Endovascular | Lecture honoraria                         |  |  |  |  |  |
| Stryker                                | Lecture honoraria                                                                                            |                                                                                                                                                                                                                                                                                                                                       |                                                                                     |                                                 |                    |                                           |  |  |  |  |  |
| Cerus Endovascular                     | Lecture honoraria                                                                                            |                                                                                                                                                                                                                                                                                                                                       |                                                                                     |                                                 |                    |                                           |  |  |  |  |  |
|                                        |                                                                                                              |                                                                                                                                                                                                                                                                                                                                       |                                                                                     |                                                 |                    |                                           |  |  |  |  |  |
| 6                                      | Payment for expert testimony                                                                                 | <input checked="" type="checkbox"/> None <table border="1"> <tr> <td></td> <td></td> </tr> <tr> <td></td> <td></td> </tr> <tr> <td></td> <td></td> </tr> </table>                                                                                                                                                                     |                                                                                     |                                                 |                    |                                           |  |  |  |  |  |
|                                        |                                                                                                              |                                                                                                                                                                                                                                                                                                                                       |                                                                                     |                                                 |                    |                                           |  |  |  |  |  |
|                                        |                                                                                                              |                                                                                                                                                                                                                                                                                                                                       |                                                                                     |                                                 |                    |                                           |  |  |  |  |  |
|                                        |                                                                                                              |                                                                                                                                                                                                                                                                                                                                       |                                                                                     |                                                 |                    |                                           |  |  |  |  |  |
| 7                                      | Support for attending meetings and/or travel                                                                 | <input type="checkbox"/> None <table border="1"> <tr> <td>Stryker</td> <td>Travel expenses</td> </tr> <tr> <td>Cerus endovascular</td> <td>Travel expenses</td> </tr> <tr> <td></td> <td></td> </tr> </table>                                                                                                                         | Stryker                                                                             | Travel expenses                                 | Cerus endovascular | Travel expenses                           |  |  |  |  |  |
| Stryker                                | Travel expenses                                                                                              |                                                                                                                                                                                                                                                                                                                                       |                                                                                     |                                                 |                    |                                           |  |  |  |  |  |
| Cerus endovascular                     | Travel expenses                                                                                              |                                                                                                                                                                                                                                                                                                                                       |                                                                                     |                                                 |                    |                                           |  |  |  |  |  |
|                                        |                                                                                                              |                                                                                                                                                                                                                                                                                                                                       |                                                                                     |                                                 |                    |                                           |  |  |  |  |  |
| 8                                      | Patents planned, issued or pending                                                                           | <input checked="" type="checkbox"/> None <table border="1"> <tr> <td></td> <td></td> </tr> <tr> <td></td> <td></td> </tr> <tr> <td></td> <td></td> </tr> </table>                                                                                                                                                                     |                                                                                     |                                                 |                    |                                           |  |  |  |  |  |
|                                        |                                                                                                              |                                                                                                                                                                                                                                                                                                                                       |                                                                                     |                                                 |                    |                                           |  |  |  |  |  |
|                                        |                                                                                                              |                                                                                                                                                                                                                                                                                                                                       |                                                                                     |                                                 |                    |                                           |  |  |  |  |  |
|                                        |                                                                                                              |                                                                                                                                                                                                                                                                                                                                       |                                                                                     |                                                 |                    |                                           |  |  |  |  |  |
| 9                                      | Participation on a Data Safety Monitoring Board or Advisory Board                                            | <input checked="" type="checkbox"/> None <table border="1"> <tr> <td></td> <td></td> </tr> <tr> <td></td> <td></td> </tr> <tr> <td></td> <td></td> </tr> </table>                                                                                                                                                                     |                                                                                     |                                                 |                    |                                           |  |  |  |  |  |
|                                        |                                                                                                              |                                                                                                                                                                                                                                                                                                                                       |                                                                                     |                                                 |                    |                                           |  |  |  |  |  |
|                                        |                                                                                                              |                                                                                                                                                                                                                                                                                                                                       |                                                                                     |                                                 |                    |                                           |  |  |  |  |  |
|                                        |                                                                                                              |                                                                                                                                                                                                                                                                                                                                       |                                                                                     |                                                 |                    |                                           |  |  |  |  |  |
| 10                                     | Leadership or fiduciary role in other board, society, committee or advocacy group, paid or unpaid            | <input checked="" type="checkbox"/> None <table border="1"> <tr> <td></td> <td></td> </tr> <tr> <td></td> <td></td> </tr> <tr> <td></td> <td></td> </tr> </table>                                                                                                                                                                     |                                                                                     |                                                 |                    |                                           |  |  |  |  |  |
|                                        |                                                                                                              |                                                                                                                                                                                                                                                                                                                                       |                                                                                     |                                                 |                    |                                           |  |  |  |  |  |
|                                        |                                                                                                              |                                                                                                                                                                                                                                                                                                                                       |                                                                                     |                                                 |                    |                                           |  |  |  |  |  |
|                                        |                                                                                                              |                                                                                                                                                                                                                                                                                                                                       |                                                                                     |                                                 |                    |                                           |  |  |  |  |  |

|                                                                                                                                                                                                                                                            |                                                                                  | Name all entities with whom you have this relationship or indicate none (add rows as needed)                                                         | Specifications/Comments (e.g., if payments were made to you or to your institution) |  |  |  |  |  |  |
|------------------------------------------------------------------------------------------------------------------------------------------------------------------------------------------------------------------------------------------------------------|----------------------------------------------------------------------------------|------------------------------------------------------------------------------------------------------------------------------------------------------|-------------------------------------------------------------------------------------|--|--|--|--|--|--|
| 11                                                                                                                                                                                                                                                         | Stock or stock options                                                           | <div><input checked="" type="checkbox"/> None</div> <table><tr><td></td><td></td></tr><tr><td></td><td></td></tr><tr><td></td><td></td></tr></table> |                                                                                     |  |  |  |  |  |  |
|                                                                                                                                                                                                                                                            |                                                                                  |                                                                                                                                                      |                                                                                     |  |  |  |  |  |  |
|                                                                                                                                                                                                                                                            |                                                                                  |                                                                                                                                                      |                                                                                     |  |  |  |  |  |  |
|                                                                                                                                                                                                                                                            |                                                                                  |                                                                                                                                                      |                                                                                     |  |  |  |  |  |  |
| 12                                                                                                                                                                                                                                                         | Receipt of equipment, materials, drugs, medical writing, gifts or other services | <div><input checked="" type="checkbox"/> None</div> <table><tr><td></td><td></td></tr><tr><td></td><td></td></tr><tr><td></td><td></td></tr></table> |                                                                                     |  |  |  |  |  |  |
|                                                                                                                                                                                                                                                            |                                                                                  |                                                                                                                                                      |                                                                                     |  |  |  |  |  |  |
|                                                                                                                                                                                                                                                            |                                                                                  |                                                                                                                                                      |                                                                                     |  |  |  |  |  |  |
|                                                                                                                                                                                                                                                            |                                                                                  |                                                                                                                                                      |                                                                                     |  |  |  |  |  |  |
| 13                                                                                                                                                                                                                                                         | Other financial or non-financial interests                                       | <div><input checked="" type="checkbox"/> None</div> <table><tr><td></td><td></td></tr><tr><td></td><td></td></tr><tr><td></td><td></td></tr></table> |                                                                                     |  |  |  |  |  |  |
|                                                                                                                                                                                                                                                            |                                                                                  |                                                                                                                                                      |                                                                                     |  |  |  |  |  |  |
|                                                                                                                                                                                                                                                            |                                                                                  |                                                                                                                                                      |                                                                                     |  |  |  |  |  |  |
|                                                                                                                                                                                                                                                            |                                                                                  |                                                                                                                                                      |                                                                                     |  |  |  |  |  |  |
| <p>Please place an “X” next to the following statement to indicate your agreement:</p> <div><input checked="" type="checkbox"/> I certify that I have answered every question and have not altered the wording of any of the questions on this form.</div> |                                                                                  |                                                                                                                                                      |                                                                                     |  |  |  |  |  |  |

## ICMJE DISCLOSURE FORM

**Date:** 12/3/2021

**Your Name:** James Byrne

**Manuscript Title:** Aneurysm treatment with WEB in the combined population of two prospective, multicenter series: 5-year follow-up

**Manuscript Number (if known):** [Click or tap here to enter text.](#)

In the interest of transparency, we ask you to disclose all relationships/activities/interests listed below that are related to the content of your manuscript. "Related" means any relation with for-profit or not-for-profit third parties whose interests may be affected by the content of the manuscript. Disclosure represents a commitment to transparency and does not necessarily indicate a bias. If you are in doubt about whether to list a relationship/activity/interest, it is preferable that you do so.

The author's relationships/activities/interests should be defined broadly. For example, if your manuscript pertains to the epidemiology of hypertension, you should declare all relationships with manufacturers of antihypertensive medication, even if that medication is not mentioned in the manuscript.

In item #1 below, report all support for the work reported in this manuscript without time limit. For all other items, the time frame for disclosure is the past 36 months.

|                                                                                                                                                         | Name all entities with whom you have this relationship or indicate none (add rows as needed)                                                                                   | Specifications/Comments (e.g., if payments were made to you or to your institution)                                                                                                                                                                                                                                                                                                                                                                                                        |                                                                                                                                                         |  |                                                                                                          |  |                                                           |  |
|---------------------------------------------------------------------------------------------------------------------------------------------------------|--------------------------------------------------------------------------------------------------------------------------------------------------------------------------------|--------------------------------------------------------------------------------------------------------------------------------------------------------------------------------------------------------------------------------------------------------------------------------------------------------------------------------------------------------------------------------------------------------------------------------------------------------------------------------------------|---------------------------------------------------------------------------------------------------------------------------------------------------------|--|----------------------------------------------------------------------------------------------------------|--|-----------------------------------------------------------|--|
| <b>Time frame: Since the initial planning of the work</b>                                                                                               |                                                                                                                                                                                |                                                                                                                                                                                                                                                                                                                                                                                                                                                                                            |                                                                                                                                                         |  |                                                                                                          |  |                                                           |  |
| <b>1</b>                                                                                                                                                | All support for the present manuscript (e.g., funding, provision of study materials, medical writing, article processing charges, etc.)<br><b>No time limit for this item.</b> | <input type="checkbox"/> <b>None</b><br><table border="1"> <tr> <td>I provided core laboratory services to Sequent Medical and subsequently MicroVention Inc through Oxford University during the conduct of these studies.</td> <td></td> </tr> <tr> <td>My institute was paid for this service by Sequent Medical and Microvention, Aliso Viejo, California, USA</td> <td></td> </tr> <tr> <td colspan="2"><a href="#">Click the tab key to add additional rows.</a></td> </tr> </table> | I provided core laboratory services to Sequent Medical and subsequently MicroVention Inc through Oxford University during the conduct of these studies. |  | My institute was paid for this service by Sequent Medical and Microvention, Aliso Viejo, California, USA |  | <a href="#">Click the tab key to add additional rows.</a> |  |
| I provided core laboratory services to Sequent Medical and subsequently MicroVention Inc through Oxford University during the conduct of these studies. |                                                                                                                                                                                |                                                                                                                                                                                                                                                                                                                                                                                                                                                                                            |                                                                                                                                                         |  |                                                                                                          |  |                                                           |  |
| My institute was paid for this service by Sequent Medical and Microvention, Aliso Viejo, California, USA                                                |                                                                                                                                                                                |                                                                                                                                                                                                                                                                                                                                                                                                                                                                                            |                                                                                                                                                         |  |                                                                                                          |  |                                                           |  |
| <a href="#">Click the tab key to add additional rows.</a>                                                                                               |                                                                                                                                                                                |                                                                                                                                                                                                                                                                                                                                                                                                                                                                                            |                                                                                                                                                         |  |                                                                                                          |  |                                                           |  |
| <b>Time frame: past 36 months</b>                                                                                                                       |                                                                                                                                                                                |                                                                                                                                                                                                                                                                                                                                                                                                                                                                                            |                                                                                                                                                         |  |                                                                                                          |  |                                                           |  |
| <b>2</b>                                                                                                                                                | Grants or contracts from any entity (if not indicated in item #1 above).                                                                                                       | <input checked="" type="checkbox"/> <b>None</b><br><table border="1"> <tr><td></td><td></td></tr> <tr><td></td><td></td></tr> <tr><td></td><td></td></tr> </table>                                                                                                                                                                                                                                                                                                                         |                                                                                                                                                         |  |                                                                                                          |  |                                                           |  |
|                                                                                                                                                         |                                                                                                                                                                                |                                                                                                                                                                                                                                                                                                                                                                                                                                                                                            |                                                                                                                                                         |  |                                                                                                          |  |                                                           |  |
|                                                                                                                                                         |                                                                                                                                                                                |                                                                                                                                                                                                                                                                                                                                                                                                                                                                                            |                                                                                                                                                         |  |                                                                                                          |  |                                                           |  |
|                                                                                                                                                         |                                                                                                                                                                                |                                                                                                                                                                                                                                                                                                                                                                                                                                                                                            |                                                                                                                                                         |  |                                                                                                          |  |                                                           |  |
| <b>3</b>                                                                                                                                                | Royalties or licenses                                                                                                                                                          | <input checked="" type="checkbox"/> <b>None</b><br><table border="1"> <tr><td></td><td></td></tr> <tr><td></td><td></td></tr> <tr><td></td><td></td></tr> </table>                                                                                                                                                                                                                                                                                                                         |                                                                                                                                                         |  |                                                                                                          |  |                                                           |  |
|                                                                                                                                                         |                                                                                                                                                                                |                                                                                                                                                                                                                                                                                                                                                                                                                                                                                            |                                                                                                                                                         |  |                                                                                                          |  |                                                           |  |
|                                                                                                                                                         |                                                                                                                                                                                |                                                                                                                                                                                                                                                                                                                                                                                                                                                                                            |                                                                                                                                                         |  |                                                                                                          |  |                                                           |  |
|                                                                                                                                                         |                                                                                                                                                                                |                                                                                                                                                                                                                                                                                                                                                                                                                                                                                            |                                                                                                                                                         |  |                                                                                                          |  |                                                           |  |

|    |                                                                                                              | Name all entities with whom you have this relationship or indicate none (add rows as needed)                                                                                           | Specifications/Comments (e.g., if payments were made to you or to your institution) |
|----|--------------------------------------------------------------------------------------------------------------|----------------------------------------------------------------------------------------------------------------------------------------------------------------------------------------|-------------------------------------------------------------------------------------|
| 4  | Consulting fees                                                                                              | <input type="checkbox"/> None<br><div> <div>Since 2018, I am a consultant to Oxford Endovascular Ltd and since 2018 Microvention Inc.</div> <div></div> <div></div> <div></div> </div> |                                                                                     |
| 5  | Payment or honoraria for lectures, presentations, speakers bureaus, manuscript writing or educational events | <input checked="" type="checkbox"/> None<br><div> <div></div> <div></div> <div></div> </div>                                                                                           |                                                                                     |
| 6  | Payment for expert testimony                                                                                 | <input checked="" type="checkbox"/> None<br><div> <div></div> <div></div> <div></div> </div>                                                                                           |                                                                                     |
| 7  | Support for attending meetings and/or travel                                                                 | <input checked="" type="checkbox"/> None<br><div> <div></div> <div></div> <div></div> </div>                                                                                           |                                                                                     |
| 8  | Patents planned, issued or pending                                                                           | <input checked="" type="checkbox"/> None<br><div> <div></div> <div></div> <div></div> </div>                                                                                           |                                                                                     |
| 9  | Participation on a Data Safety Monitoring Board or Advisory Board                                            | <input type="checkbox"/> None<br><div> <div>Core Lab activities as described above</div> <div></div> <div></div> </div>                                                                |                                                                                     |
| 10 | Leadership or fiduciary role in other board, society, committee or advocacy group, paid or unpaid            | <input type="checkbox"/> None<br><div> <div>Board Member of Oxford Endovascular Ltd.</div> <div></div> <div></div> </div>                                                              |                                                                                     |

|                                                                                                                                                                                                                                                               |                                                                                  | Name all entities with whom you have this relationship or indicate none (add rows as needed) | Specifications/Comments (e.g., if payments were made to you or to your institution) |
|---------------------------------------------------------------------------------------------------------------------------------------------------------------------------------------------------------------------------------------------------------------|----------------------------------------------------------------------------------|----------------------------------------------------------------------------------------------|-------------------------------------------------------------------------------------|
| 11                                                                                                                                                                                                                                                            | Stock or stock options                                                           | <input type="checkbox"/> None                                                                |                                                                                     |
|                                                                                                                                                                                                                                                               |                                                                                  | Stock owner in Oxford Endovascular Ltd                                                       |                                                                                     |
|                                                                                                                                                                                                                                                               |                                                                                  |                                                                                              |                                                                                     |
|                                                                                                                                                                                                                                                               |                                                                                  |                                                                                              |                                                                                     |
| 12                                                                                                                                                                                                                                                            | Receipt of equipment, materials, drugs, medical writing, gifts or other services | <input checked="" type="checkbox"/> None                                                     |                                                                                     |
|                                                                                                                                                                                                                                                               |                                                                                  |                                                                                              |                                                                                     |
|                                                                                                                                                                                                                                                               |                                                                                  |                                                                                              |                                                                                     |
|                                                                                                                                                                                                                                                               |                                                                                  |                                                                                              |                                                                                     |
| 13                                                                                                                                                                                                                                                            | Other financial or non-financial interests                                       | <input type="checkbox"/> None                                                                |                                                                                     |
|                                                                                                                                                                                                                                                               |                                                                                  | None relervant                                                                               |                                                                                     |
|                                                                                                                                                                                                                                                               |                                                                                  |                                                                                              |                                                                                     |
|                                                                                                                                                                                                                                                               |                                                                                  |                                                                                              |                                                                                     |
| <p><b>Please place an "X" next to the following statement to indicate your agreement:</b></p> <p><input checked="" type="checkbox"/> I certify that I have answered every question and have not altered the wording of any of the questions on this form.</p> |                                                                                  |                                                                                              |                                                                                     |

## ICMJE DISCLOSURE FORM

**Date:** 3/1/2022

**Your Name:** Molyneux

**Manuscript Title:** Aneurysm treatment with WEB in the combined population of two prospective, multicenter series: 5-year follow-up

**Manuscript Number (if known):** [Click or tap here to enter text.](#)

In the interest of transparency, we ask you to disclose all relationships/activities/interests listed below that are related to the content of your manuscript. "Related" means any relation with for-profit or not-for-profit third parties whose interests may be affected by the content of the manuscript. Disclosure represents a commitment to transparency and does not necessarily indicate a bias. If you are in doubt about whether to list a relationship/activity/interest, it is preferable that you do so.

The author's relationships/activities/interests should be defined broadly. For example, if your manuscript pertains to the epidemiology of hypertension, you should declare all relationships with manufacturers of antihypertensive medication, even if that medication is not mentioned in the manuscript.

In item #1 below, report all support for the work reported in this manuscript without time limit. For all other items, the time frame for disclosure is the past 36 months.

|                                                                                                                                                                   | Name all entities with whom you have this relationship or indicate none (add rows as needed)                                                                                   | Specifications/Comments (e.g., if payments were made to you or to your institution)                                                                                                                                                                                                                                                                                                                                                                                                                             |                                                                                                                                                                   |  |                                                                                                          |  |                                                           |  |
|-------------------------------------------------------------------------------------------------------------------------------------------------------------------|--------------------------------------------------------------------------------------------------------------------------------------------------------------------------------|-----------------------------------------------------------------------------------------------------------------------------------------------------------------------------------------------------------------------------------------------------------------------------------------------------------------------------------------------------------------------------------------------------------------------------------------------------------------------------------------------------------------|-------------------------------------------------------------------------------------------------------------------------------------------------------------------|--|----------------------------------------------------------------------------------------------------------|--|-----------------------------------------------------------|--|
| <b>Time frame: Since the initial planning of the work</b>                                                                                                         |                                                                                                                                                                                |                                                                                                                                                                                                                                                                                                                                                                                                                                                                                                                 |                                                                                                                                                                   |  |                                                                                                          |  |                                                           |  |
| <b>1</b>                                                                                                                                                          | All support for the present manuscript (e.g., funding, provision of study materials, medical writing, article processing charges, etc.)<br><b>No time limit for this item.</b> | <input checked="" type="checkbox"/> <b>None</b><br><table border="1"> <tr> <td>I provided Clinical Events Committee services to Sequent Medical and subsequently MicroVention Inc through Oxford University during the conduct of these studies.</td> <td></td> </tr> <tr> <td>My institute was paid for this service by Sequent Medical and Microvention, Aliso Viejo, California, USA</td> <td></td> </tr> <tr> <td colspan="2"><a href="#">Click the tab key to add additional rows.</a></td> </tr> </table> | I provided Clinical Events Committee services to Sequent Medical and subsequently MicroVention Inc through Oxford University during the conduct of these studies. |  | My institute was paid for this service by Sequent Medical and Microvention, Aliso Viejo, California, USA |  | <a href="#">Click the tab key to add additional rows.</a> |  |
| I provided Clinical Events Committee services to Sequent Medical and subsequently MicroVention Inc through Oxford University during the conduct of these studies. |                                                                                                                                                                                |                                                                                                                                                                                                                                                                                                                                                                                                                                                                                                                 |                                                                                                                                                                   |  |                                                                                                          |  |                                                           |  |
| My institute was paid for this service by Sequent Medical and Microvention, Aliso Viejo, California, USA                                                          |                                                                                                                                                                                |                                                                                                                                                                                                                                                                                                                                                                                                                                                                                                                 |                                                                                                                                                                   |  |                                                                                                          |  |                                                           |  |
| <a href="#">Click the tab key to add additional rows.</a>                                                                                                         |                                                                                                                                                                                |                                                                                                                                                                                                                                                                                                                                                                                                                                                                                                                 |                                                                                                                                                                   |  |                                                                                                          |  |                                                           |  |
| <b>Time frame: past 36 months</b>                                                                                                                                 |                                                                                                                                                                                |                                                                                                                                                                                                                                                                                                                                                                                                                                                                                                                 |                                                                                                                                                                   |  |                                                                                                          |  |                                                           |  |
| <b>2</b>                                                                                                                                                          | Grants or contracts from any entity (if not indicated in item #1 above).                                                                                                       | <input checked="" type="checkbox"/> <b>None</b><br><table border="1"> <tr><td></td><td></td></tr> <tr><td></td><td></td></tr> <tr><td></td><td></td></tr> </table>                                                                                                                                                                                                                                                                                                                                              |                                                                                                                                                                   |  |                                                                                                          |  |                                                           |  |
|                                                                                                                                                                   |                                                                                                                                                                                |                                                                                                                                                                                                                                                                                                                                                                                                                                                                                                                 |                                                                                                                                                                   |  |                                                                                                          |  |                                                           |  |
|                                                                                                                                                                   |                                                                                                                                                                                |                                                                                                                                                                                                                                                                                                                                                                                                                                                                                                                 |                                                                                                                                                                   |  |                                                                                                          |  |                                                           |  |
|                                                                                                                                                                   |                                                                                                                                                                                |                                                                                                                                                                                                                                                                                                                                                                                                                                                                                                                 |                                                                                                                                                                   |  |                                                                                                          |  |                                                           |  |
| <b>3</b>                                                                                                                                                          | Royalties or licenses                                                                                                                                                          | <input checked="" type="checkbox"/> <b>None</b><br><table border="1"> <tr><td></td><td></td></tr> <tr><td></td><td></td></tr> <tr><td></td><td></td></tr> </table>                                                                                                                                                                                                                                                                                                                                              |                                                                                                                                                                   |  |                                                                                                          |  |                                                           |  |
|                                                                                                                                                                   |                                                                                                                                                                                |                                                                                                                                                                                                                                                                                                                                                                                                                                                                                                                 |                                                                                                                                                                   |  |                                                                                                          |  |                                                           |  |
|                                                                                                                                                                   |                                                                                                                                                                                |                                                                                                                                                                                                                                                                                                                                                                                                                                                                                                                 |                                                                                                                                                                   |  |                                                                                                          |  |                                                           |  |
|                                                                                                                                                                   |                                                                                                                                                                                |                                                                                                                                                                                                                                                                                                                                                                                                                                                                                                                 |                                                                                                                                                                   |  |                                                                                                          |  |                                                           |  |

|              |                                                                                                              | Name all entities with whom you have this relationship or indicate none (add rows as needed)                                                                                            | Specifications/Comments (e.g., if payments were made to you or to your institution) |             |  |  |  |  |  |  |  |
|--------------|--------------------------------------------------------------------------------------------------------------|-----------------------------------------------------------------------------------------------------------------------------------------------------------------------------------------|-------------------------------------------------------------------------------------|-------------|--|--|--|--|--|--|--|
| 4            | Consulting fees                                                                                              | <input checked="" type="checkbox"/> None<br><table border="1"> <tr><td></td><td></td></tr> <tr><td></td><td></td></tr> <tr><td></td><td></td></tr> <tr><td></td><td></td></tr> </table> |                                                                                     |             |  |  |  |  |  |  |  |
|              |                                                                                                              |                                                                                                                                                                                         |                                                                                     |             |  |  |  |  |  |  |  |
|              |                                                                                                              |                                                                                                                                                                                         |                                                                                     |             |  |  |  |  |  |  |  |
|              |                                                                                                              |                                                                                                                                                                                         |                                                                                     |             |  |  |  |  |  |  |  |
|              |                                                                                                              |                                                                                                                                                                                         |                                                                                     |             |  |  |  |  |  |  |  |
| 5            | Payment or honoraria for lectures, presentations, speakers bureaus, manuscript writing or educational events | <input type="checkbox"/> None<br><table border="1"> <tr> <td>microvention</td> <td>proctoring</td> </tr> <tr><td></td><td></td></tr> <tr><td></td><td></td></tr> </table>               | microvention                                                                        | proctoring  |  |  |  |  |  |  |  |
| microvention | proctoring                                                                                                   |                                                                                                                                                                                         |                                                                                     |             |  |  |  |  |  |  |  |
|              |                                                                                                              |                                                                                                                                                                                         |                                                                                     |             |  |  |  |  |  |  |  |
|              |                                                                                                              |                                                                                                                                                                                         |                                                                                     |             |  |  |  |  |  |  |  |
| 6            | Payment for expert testimony                                                                                 | <input checked="" type="checkbox"/> None<br><table border="1"> <tr><td></td><td></td></tr> <tr><td></td><td></td></tr> <tr><td></td><td></td></tr> </table>                             |                                                                                     |             |  |  |  |  |  |  |  |
|              |                                                                                                              |                                                                                                                                                                                         |                                                                                     |             |  |  |  |  |  |  |  |
|              |                                                                                                              |                                                                                                                                                                                         |                                                                                     |             |  |  |  |  |  |  |  |
|              |                                                                                                              |                                                                                                                                                                                         |                                                                                     |             |  |  |  |  |  |  |  |
| 7            | Support for attending meetings and/or travel                                                                 | <input type="checkbox"/> None<br><table border="1"> <tr> <td>microvention</td> <td>institution</td> </tr> <tr><td></td><td></td></tr> <tr><td></td><td></td></tr> </table>              | microvention                                                                        | institution |  |  |  |  |  |  |  |
| microvention | institution                                                                                                  |                                                                                                                                                                                         |                                                                                     |             |  |  |  |  |  |  |  |
|              |                                                                                                              |                                                                                                                                                                                         |                                                                                     |             |  |  |  |  |  |  |  |
|              |                                                                                                              |                                                                                                                                                                                         |                                                                                     |             |  |  |  |  |  |  |  |
| 8            | Patents planned, issued or pending                                                                           | <input checked="" type="checkbox"/> None<br><table border="1"> <tr><td></td><td></td></tr> <tr><td></td><td></td></tr> <tr><td></td><td></td></tr> </table>                             |                                                                                     |             |  |  |  |  |  |  |  |
|              |                                                                                                              |                                                                                                                                                                                         |                                                                                     |             |  |  |  |  |  |  |  |
|              |                                                                                                              |                                                                                                                                                                                         |                                                                                     |             |  |  |  |  |  |  |  |
|              |                                                                                                              |                                                                                                                                                                                         |                                                                                     |             |  |  |  |  |  |  |  |
| 9            | Participation on a Data Safety Monitoring Board or Advisory Board                                            | <input checked="" type="checkbox"/> None<br><table border="1"> <tr><td></td><td></td></tr> <tr><td></td><td></td></tr> <tr><td></td><td></td></tr> </table>                             |                                                                                     |             |  |  |  |  |  |  |  |
|              |                                                                                                              |                                                                                                                                                                                         |                                                                                     |             |  |  |  |  |  |  |  |
|              |                                                                                                              |                                                                                                                                                                                         |                                                                                     |             |  |  |  |  |  |  |  |
|              |                                                                                                              |                                                                                                                                                                                         |                                                                                     |             |  |  |  |  |  |  |  |
| 10           | Leadership or fiduciary role in other board, society, committee or advocacy group, paid or unpaid            | <input checked="" type="checkbox"/> None<br><table border="1"> <tr><td></td><td></td></tr> <tr><td></td><td></td></tr> <tr><td></td><td></td></tr> </table>                             |                                                                                     |             |  |  |  |  |  |  |  |
|              |                                                                                                              |                                                                                                                                                                                         |                                                                                     |             |  |  |  |  |  |  |  |
|              |                                                                                                              |                                                                                                                                                                                         |                                                                                     |             |  |  |  |  |  |  |  |
|              |                                                                                                              |                                                                                                                                                                                         |                                                                                     |             |  |  |  |  |  |  |  |



|    |                                                                                  | Name all entities with whom you have this relationship or indicate none (add rows as needed)                                                                | Specifications/Comments (e.g., if payments were made to you or to your institution) |  |  |  |  |  |  |
|----|----------------------------------------------------------------------------------|-------------------------------------------------------------------------------------------------------------------------------------------------------------|-------------------------------------------------------------------------------------|--|--|--|--|--|--|
| 11 | Stock or stock options                                                           | <input checked="" type="checkbox"/> None<br><table border="1"> <tr><td></td><td></td></tr> <tr><td></td><td></td></tr> <tr><td></td><td></td></tr> </table> |                                                                                     |  |  |  |  |  |  |
|    |                                                                                  |                                                                                                                                                             |                                                                                     |  |  |  |  |  |  |
|    |                                                                                  |                                                                                                                                                             |                                                                                     |  |  |  |  |  |  |
|    |                                                                                  |                                                                                                                                                             |                                                                                     |  |  |  |  |  |  |
| 12 | Receipt of equipment, materials, drugs, medical writing, gifts or other services | <input checked="" type="checkbox"/> None<br><table border="1"> <tr><td></td><td></td></tr> <tr><td></td><td></td></tr> <tr><td></td><td></td></tr> </table> |                                                                                     |  |  |  |  |  |  |
|    |                                                                                  |                                                                                                                                                             |                                                                                     |  |  |  |  |  |  |
|    |                                                                                  |                                                                                                                                                             |                                                                                     |  |  |  |  |  |  |
|    |                                                                                  |                                                                                                                                                             |                                                                                     |  |  |  |  |  |  |
| 13 | Other financial or non-financial interests                                       | <input checked="" type="checkbox"/> None<br><table border="1"> <tr><td></td><td></td></tr> <tr><td></td><td></td></tr> <tr><td></td><td></td></tr> </table> |                                                                                     |  |  |  |  |  |  |
|    |                                                                                  |                                                                                                                                                             |                                                                                     |  |  |  |  |  |  |
|    |                                                                                  |                                                                                                                                                             |                                                                                     |  |  |  |  |  |  |
|    |                                                                                  |                                                                                                                                                             |                                                                                     |  |  |  |  |  |  |

**Please place an "X" next to the following statement to indicate your agreement:**

☒ I certify that I have answered every question and have not altered the wording of any of the questions on this form.

## ICMJE DISCLOSURE FORM

**Date:** 11/8/2021

**Your Name:** Prof. Dr. med. Werner Weber

**Manuscript Title:** Aneurysm treatment with WEB in the combined population of two prospective, multicenter series: 5-year follow-up

**Manuscript Number (if known):** Neurintsurg-2021-017972R1

In the interest of transparency, we ask you to disclose all relationships/activities/interests listed below that are related to the content of your manuscript. "Related" means any relation with for-profit or not-for-profit third parties whose interests may be affected by the content of the manuscript. Disclosure represents a commitment to transparency and does not necessarily indicate a bias. If you are in doubt about whether to list a relationship/activity/interest, it is preferable that you do so.

The author's relationships/activities/interests should be defined broadly. For example, if your manuscript pertains to the epidemiology of hypertension, you should declare all relationships with manufacturers of antihypertensive medication, even if that medication is not mentioned in the manuscript.

In item #1 below, report all support for the work reported in this manuscript without time limit. For all other items, the time frame for disclosure is the past 36 months.

|                                                           | Name all entities with whom you have this relationship or indicate none (add rows as needed)                                                                                   | Specifications/Comments (e.g., if payments were made to you or to your institution)                                                                                                                          |  |  |  |  |  |  |
|-----------------------------------------------------------|--------------------------------------------------------------------------------------------------------------------------------------------------------------------------------|--------------------------------------------------------------------------------------------------------------------------------------------------------------------------------------------------------------|--|--|--|--|--|--|
| <b>Time frame: Since the initial planning of the work</b> |                                                                                                                                                                                |                                                                                                                                                                                                              |  |  |  |  |  |  |
| <b>1</b>                                                  | All support for the present manuscript (e.g., funding, provision of study materials, medical writing, article processing charges, etc.)<br><b>No time limit for this item.</b> | <input checked="" type="checkbox"/> <b>None</b><br><table border="1"> <tr><td></td><td></td></tr> <tr><td></td><td></td></tr> <tr><td></td><td></td></tr> </table> Click the tab key to add additional rows. |  |  |  |  |  |  |
|                                                           |                                                                                                                                                                                |                                                                                                                                                                                                              |  |  |  |  |  |  |
|                                                           |                                                                                                                                                                                |                                                                                                                                                                                                              |  |  |  |  |  |  |
|                                                           |                                                                                                                                                                                |                                                                                                                                                                                                              |  |  |  |  |  |  |
| <b>Time frame: past 36 months</b>                         |                                                                                                                                                                                |                                                                                                                                                                                                              |  |  |  |  |  |  |
| <b>2</b>                                                  | Grants or contracts from any entity (if not indicated in item #1 above).                                                                                                       | <input checked="" type="checkbox"/> <b>None</b><br><table border="1"> <tr><td></td><td></td></tr> <tr><td></td><td></td></tr> <tr><td></td><td></td></tr> </table>                                           |  |  |  |  |  |  |
|                                                           |                                                                                                                                                                                |                                                                                                                                                                                                              |  |  |  |  |  |  |
|                                                           |                                                                                                                                                                                |                                                                                                                                                                                                              |  |  |  |  |  |  |
|                                                           |                                                                                                                                                                                |                                                                                                                                                                                                              |  |  |  |  |  |  |
| <b>3</b>                                                  | Royalties or licenses                                                                                                                                                          | <input checked="" type="checkbox"/> <b>None</b><br><table border="1"> <tr><td></td><td></td></tr> <tr><td></td><td></td></tr> <tr><td></td><td></td></tr> </table>                                           |  |  |  |  |  |  |
|                                                           |                                                                                                                                                                                |                                                                                                                                                                                                              |  |  |  |  |  |  |
|                                                           |                                                                                                                                                                                |                                                                                                                                                                                                              |  |  |  |  |  |  |
|                                                           |                                                                                                                                                                                |                                                                                                                                                                                                              |  |  |  |  |  |  |

|    |                                                                                                              | Name all entities with whom you have this relationship or indicate none (add rows as needed) | Specifications/Comments (e.g., if payments were made to you or to your institution) |
|----|--------------------------------------------------------------------------------------------------------------|----------------------------------------------------------------------------------------------|-------------------------------------------------------------------------------------|
| 4  | Consulting fees                                                                                              | <input type="checkbox"/> <b>None</b>                                                         |                                                                                     |
|    |                                                                                                              |                                                                                              | Proctoring, presentations, lecture                                                  |
|    |                                                                                                              |                                                                                              |                                                                                     |
|    |                                                                                                              |                                                                                              |                                                                                     |
| 5  | Payment or honoraria for lectures, presentations, speakers bureaus, manuscript writing or educational events | <input checked="" type="checkbox"/> <b>None</b>                                              |                                                                                     |
|    |                                                                                                              |                                                                                              |                                                                                     |
|    |                                                                                                              |                                                                                              |                                                                                     |
|    |                                                                                                              |                                                                                              |                                                                                     |
| 6  | Payment for expert testimony                                                                                 | <input checked="" type="checkbox"/> <b>None</b>                                              |                                                                                     |
|    |                                                                                                              |                                                                                              |                                                                                     |
|    |                                                                                                              |                                                                                              |                                                                                     |
|    |                                                                                                              |                                                                                              |                                                                                     |
| 7  | Support for attending meetings and/or travel                                                                 | <input checked="" type="checkbox"/> <b>None</b>                                              |                                                                                     |
|    |                                                                                                              |                                                                                              |                                                                                     |
|    |                                                                                                              |                                                                                              |                                                                                     |
|    |                                                                                                              |                                                                                              |                                                                                     |
| 8  | Patents planned, issued or pending                                                                           | <input checked="" type="checkbox"/> <b>None</b>                                              |                                                                                     |
|    |                                                                                                              |                                                                                              |                                                                                     |
|    |                                                                                                              |                                                                                              |                                                                                     |
|    |                                                                                                              |                                                                                              |                                                                                     |
| 9  | Participation on a Data Safety Monitoring Board or Advisory Board                                            | <input checked="" type="checkbox"/> <b>None</b>                                              |                                                                                     |
|    |                                                                                                              |                                                                                              |                                                                                     |
|    |                                                                                                              |                                                                                              |                                                                                     |
|    |                                                                                                              |                                                                                              |                                                                                     |
| 10 | Leadership or fiduciary role in other board, society, committee or advocacy group, paid or unpaid            | <input checked="" type="checkbox"/> <b>None</b>                                              |                                                                                     |
|    |                                                                                                              |                                                                                              |                                                                                     |
|    |                                                                                                              |                                                                                              |                                                                                     |
|    |                                                                                                              |                                                                                              |                                                                                     |

|    |                                                                                  | Name all entities with whom you have this relationship or indicate none (add rows as needed)                                                         | Specifications/Comments (e.g., if payments were made to you or to your institution) |  |  |  |  |  |  |
|----|----------------------------------------------------------------------------------|------------------------------------------------------------------------------------------------------------------------------------------------------|-------------------------------------------------------------------------------------|--|--|--|--|--|--|
| 11 | Stock or stock options                                                           | <div><input checked="" type="checkbox"/> None</div> <table><tr><td></td><td></td></tr><tr><td></td><td></td></tr><tr><td></td><td></td></tr></table> |                                                                                     |  |  |  |  |  |  |
|    |                                                                                  |                                                                                                                                                      |                                                                                     |  |  |  |  |  |  |
|    |                                                                                  |                                                                                                                                                      |                                                                                     |  |  |  |  |  |  |
|    |                                                                                  |                                                                                                                                                      |                                                                                     |  |  |  |  |  |  |
| 12 | Receipt of equipment, materials, drugs, medical writing, gifts or other services | <div><input checked="" type="checkbox"/> None</div> <table><tr><td></td><td></td></tr><tr><td></td><td></td></tr><tr><td></td><td></td></tr></table> |                                                                                     |  |  |  |  |  |  |
|    |                                                                                  |                                                                                                                                                      |                                                                                     |  |  |  |  |  |  |
|    |                                                                                  |                                                                                                                                                      |                                                                                     |  |  |  |  |  |  |
|    |                                                                                  |                                                                                                                                                      |                                                                                     |  |  |  |  |  |  |
| 13 | Other financial or non-financial interests                                       | <div><input checked="" type="checkbox"/> None</div> <table><tr><td></td><td></td></tr><tr><td></td><td></td></tr><tr><td></td><td></td></tr></table> |                                                                                     |  |  |  |  |  |  |
|    |                                                                                  |                                                                                                                                                      |                                                                                     |  |  |  |  |  |  |
|    |                                                                                  |                                                                                                                                                      |                                                                                     |  |  |  |  |  |  |
|    |                                                                                  |                                                                                                                                                      |                                                                                     |  |  |  |  |  |  |

Please place an “X” next to the following statement to indicate your agreement:

☒ I certify that I have answered every question and have not altered the wording of any of the questions on this form.

## ICMJE DISCLOSURE FORM

**Date:** 11/4/2021

**Your Name:** Jens Fiehler

**Manuscript Title:** Aneurysm treatment with WEB in the combined population of two prospective, multicenter series: 5-year follow-up

**Manuscript Number (if known):** Neurintsurg-2021018414

In the interest of transparency, we ask you to disclose all relationships/activities/interests listed below that are related to the content of your manuscript. "Related" means any relation with for-profit or not-for-profit third parties whose interests may be affected by the content of the manuscript. Disclosure represents a commitment to transparency and does not necessarily indicate a bias. If you are in doubt about whether to list a relationship/activity/interest, it is preferable that you do so.

The author's relationships/activities/interests should be defined broadly. For example, if your manuscript pertains to the epidemiology of hypertension, you should declare all relationships with manufacturers of antihypertensive medication, even if that medication is not mentioned in the manuscript.

In item #1 below, report all support for the work reported in this manuscript without time limit. For all other items, the time frame for disclosure is the past 36 months.

|                                                           | Name all entities with whom you have this relationship or indicate none (add rows as needed)                                                                                   | Specifications/Comments (e.g., if payments were made to you or to your institution)                                                                                                                         |              |                   |  |  |  |                                           |
|-----------------------------------------------------------|--------------------------------------------------------------------------------------------------------------------------------------------------------------------------------|-------------------------------------------------------------------------------------------------------------------------------------------------------------------------------------------------------------|--------------|-------------------|--|--|--|-------------------------------------------|
| <b>Time frame: Since the initial planning of the work</b> |                                                                                                                                                                                |                                                                                                                                                                                                             |              |                   |  |  |  |                                           |
| <b>1</b>                                                  | All support for the present manuscript (e.g., funding, provision of study materials, medical writing, article processing charges, etc.)<br><b>No time limit for this item.</b> | <input checked="" type="checkbox"/> <b>None</b><br><table border="1"> <tr><td></td><td></td></tr> <tr><td></td><td></td></tr> <tr><td></td><td>Click the tab key to add additional rows.</td></tr> </table> |              |                   |  |  |  | Click the tab key to add additional rows. |
|                                                           |                                                                                                                                                                                |                                                                                                                                                                                                             |              |                   |  |  |  |                                           |
|                                                           |                                                                                                                                                                                |                                                                                                                                                                                                             |              |                   |  |  |  |                                           |
|                                                           | Click the tab key to add additional rows.                                                                                                                                      |                                                                                                                                                                                                             |              |                   |  |  |  |                                           |
| <b>Time frame: past 36 months</b>                         |                                                                                                                                                                                |                                                                                                                                                                                                             |              |                   |  |  |  |                                           |
| <b>2</b>                                                  | Grants or contracts from any entity (if not indicated in item #1 above).                                                                                                       | <input type="checkbox"/> <b>None</b><br><table border="1"> <tr> <td>Microvention</td> <td>To my institution</td> </tr> <tr><td></td><td></td></tr> <tr><td></td><td></td></tr> </table>                     | Microvention | To my institution |  |  |  |                                           |
| Microvention                                              | To my institution                                                                                                                                                              |                                                                                                                                                                                                             |              |                   |  |  |  |                                           |
|                                                           |                                                                                                                                                                                |                                                                                                                                                                                                             |              |                   |  |  |  |                                           |
|                                                           |                                                                                                                                                                                |                                                                                                                                                                                                             |              |                   |  |  |  |                                           |
| <b>3</b>                                                  | Royalties or licenses                                                                                                                                                          | <input checked="" type="checkbox"/> <b>None</b><br><table border="1"> <tr><td></td><td></td></tr> <tr><td></td><td></td></tr> <tr><td></td><td></td></tr> </table>                                          |              |                   |  |  |  |                                           |
|                                                           |                                                                                                                                                                                |                                                                                                                                                                                                             |              |                   |  |  |  |                                           |
|                                                           |                                                                                                                                                                                |                                                                                                                                                                                                             |              |                   |  |  |  |                                           |
|                                                           |                                                                                                                                                                                |                                                                                                                                                                                                             |              |                   |  |  |  |                                           |

|                        |                                                                                                              | Name all entities with whom you have this relationship or indicate none (add rows as needed)                                                                                                                                 | Specifications/Comments (e.g., if payments were made to you or to your institution) |                        |            |         |            |  |  |  |  |
|------------------------|--------------------------------------------------------------------------------------------------------------|------------------------------------------------------------------------------------------------------------------------------------------------------------------------------------------------------------------------------|-------------------------------------------------------------------------------------|------------------------|------------|---------|------------|--|--|--|--|
| 4                      | Consulting fees                                                                                              | <input type="checkbox"/> None <table border="1"> <tr> <td>Microvention</td> <td>Made to me</td> </tr> <tr> <td>Sequent</td> <td>Made to me</td> </tr> <tr> <td></td> <td></td> </tr> <tr> <td></td> <td></td> </tr> </table> |                                                                                     | Microvention           | Made to me | Sequent | Made to me |  |  |  |  |
| Microvention           | Made to me                                                                                                   |                                                                                                                                                                                                                              |                                                                                     |                        |            |         |            |  |  |  |  |
| Sequent                | Made to me                                                                                                   |                                                                                                                                                                                                                              |                                                                                     |                        |            |         |            |  |  |  |  |
|                        |                                                                                                              |                                                                                                                                                                                                                              |                                                                                     |                        |            |         |            |  |  |  |  |
|                        |                                                                                                              |                                                                                                                                                                                                                              |                                                                                     |                        |            |         |            |  |  |  |  |
| 5                      | Payment or honoraria for lectures, presentations, speakers bureaus, manuscript writing or educational events | <input type="checkbox"/> None <table border="1"> <tr> <td>Microvention</td> <td>Made to me</td> </tr> <tr> <td></td> <td></td> </tr> <tr> <td></td> <td></td> </tr> </table>                                                 |                                                                                     | Microvention           | Made to me |         |            |  |  |  |  |
| Microvention           | Made to me                                                                                                   |                                                                                                                                                                                                                              |                                                                                     |                        |            |         |            |  |  |  |  |
|                        |                                                                                                              |                                                                                                                                                                                                                              |                                                                                     |                        |            |         |            |  |  |  |  |
|                        |                                                                                                              |                                                                                                                                                                                                                              |                                                                                     |                        |            |         |            |  |  |  |  |
| 6                      | Payment for expert testimony                                                                                 | <input checked="" type="checkbox"/> None <table border="1"> <tr> <td></td> <td></td> </tr> <tr> <td></td> <td></td> </tr> <tr> <td></td> <td></td> </tr> </table>                                                            |                                                                                     |                        |            |         |            |  |  |  |  |
|                        |                                                                                                              |                                                                                                                                                                                                                              |                                                                                     |                        |            |         |            |  |  |  |  |
|                        |                                                                                                              |                                                                                                                                                                                                                              |                                                                                     |                        |            |         |            |  |  |  |  |
|                        |                                                                                                              |                                                                                                                                                                                                                              |                                                                                     |                        |            |         |            |  |  |  |  |
| 7                      | Support for attending meetings and/or travel                                                                 | <input checked="" type="checkbox"/> None <table border="1"> <tr> <td></td> <td></td> </tr> <tr> <td></td> <td></td> </tr> <tr> <td></td> <td></td> </tr> </table>                                                            |                                                                                     |                        |            |         |            |  |  |  |  |
|                        |                                                                                                              |                                                                                                                                                                                                                              |                                                                                     |                        |            |         |            |  |  |  |  |
|                        |                                                                                                              |                                                                                                                                                                                                                              |                                                                                     |                        |            |         |            |  |  |  |  |
|                        |                                                                                                              |                                                                                                                                                                                                                              |                                                                                     |                        |            |         |            |  |  |  |  |
| 8                      | Patents planned, issued or pending                                                                           | <input checked="" type="checkbox"/> None <table border="1"> <tr> <td></td> <td></td> </tr> <tr> <td></td> <td></td> </tr> <tr> <td></td> <td></td> </tr> </table>                                                            |                                                                                     |                        |            |         |            |  |  |  |  |
|                        |                                                                                                              |                                                                                                                                                                                                                              |                                                                                     |                        |            |         |            |  |  |  |  |
|                        |                                                                                                              |                                                                                                                                                                                                                              |                                                                                     |                        |            |         |            |  |  |  |  |
|                        |                                                                                                              |                                                                                                                                                                                                                              |                                                                                     |                        |            |         |            |  |  |  |  |
| 9                      | Participation on a Data Safety Monitoring Board or Advisory Board                                            | <input checked="" type="checkbox"/> None <table border="1"> <tr> <td></td> <td></td> </tr> <tr> <td></td> <td></td> </tr> <tr> <td></td> <td></td> </tr> </table>                                                            |                                                                                     |                        |            |         |            |  |  |  |  |
|                        |                                                                                                              |                                                                                                                                                                                                                              |                                                                                     |                        |            |         |            |  |  |  |  |
|                        |                                                                                                              |                                                                                                                                                                                                                              |                                                                                     |                        |            |         |            |  |  |  |  |
|                        |                                                                                                              |                                                                                                                                                                                                                              |                                                                                     |                        |            |         |            |  |  |  |  |
| 10                     | Leadership or fiduciary role in other board, society, committee or advocacy group, paid or unpaid            | <input type="checkbox"/> None <table border="1"> <tr> <td>JNIS: Associate Editor</td> <td></td> </tr> <tr> <td></td> <td></td> </tr> <tr> <td></td> <td></td> </tr> </table>                                                 |                                                                                     | JNIS: Associate Editor |            |         |            |  |  |  |  |
| JNIS: Associate Editor |                                                                                                              |                                                                                                                                                                                                                              |                                                                                     |                        |            |         |            |  |  |  |  |
|                        |                                                                                                              |                                                                                                                                                                                                                              |                                                                                     |                        |            |         |            |  |  |  |  |
|                        |                                                                                                              |                                                                                                                                                                                                                              |                                                                                     |                        |            |         |            |  |  |  |  |

|    |                                                                                  | Name all entities with whom you have this relationship or indicate none (add rows as needed)                                                                | Specifications/Comments (e.g., if payments were made to you or to your institution) |  |  |  |  |  |  |
|----|----------------------------------------------------------------------------------|-------------------------------------------------------------------------------------------------------------------------------------------------------------|-------------------------------------------------------------------------------------|--|--|--|--|--|--|
| 11 | Stock or stock options                                                           | <input checked="" type="checkbox"/> None<br><table border="1"> <tr><td></td><td></td></tr> <tr><td></td><td></td></tr> <tr><td></td><td></td></tr> </table> |                                                                                     |  |  |  |  |  |  |
|    |                                                                                  |                                                                                                                                                             |                                                                                     |  |  |  |  |  |  |
|    |                                                                                  |                                                                                                                                                             |                                                                                     |  |  |  |  |  |  |
|    |                                                                                  |                                                                                                                                                             |                                                                                     |  |  |  |  |  |  |
| 12 | Receipt of equipment, materials, drugs, medical writing, gifts or other services | <input checked="" type="checkbox"/> None<br><table border="1"> <tr><td></td><td></td></tr> <tr><td></td><td></td></tr> <tr><td></td><td></td></tr> </table> |                                                                                     |  |  |  |  |  |  |
|    |                                                                                  |                                                                                                                                                             |                                                                                     |  |  |  |  |  |  |
|    |                                                                                  |                                                                                                                                                             |                                                                                     |  |  |  |  |  |  |
|    |                                                                                  |                                                                                                                                                             |                                                                                     |  |  |  |  |  |  |
| 13 | Other financial or non-financial interests                                       | <input checked="" type="checkbox"/> None<br><table border="1"> <tr><td></td><td></td></tr> <tr><td></td><td></td></tr> <tr><td></td><td></td></tr> </table> |                                                                                     |  |  |  |  |  |  |
|    |                                                                                  |                                                                                                                                                             |                                                                                     |  |  |  |  |  |  |
|    |                                                                                  |                                                                                                                                                             |                                                                                     |  |  |  |  |  |  |
|    |                                                                                  |                                                                                                                                                             |                                                                                     |  |  |  |  |  |  |

**Please place an "X" next to the following statement to indicate your agreement:**

☒ I certify that I have answered every question and have not altered the wording of any of the questions on this form.



## ICMJE DISCLOSURE FORM

**Date:** 11/16/2021

**Your Name:** ANNE CHRISTINE JANUEL

**Manuscript Title:** Aneurysm treatment with WEB in the combined population of two prospective, multicenter series: 5-year follow-up

**Manuscript Number (if known):** [Click or tap here to enter text.](#)

In the interest of transparency, we ask you to disclose all relationships/activities/interests listed below that are related to the content of your manuscript. "Related" means any relation with for-profit or not-for-profit third parties whose interests may be affected by the content of the manuscript. Disclosure represents a commitment to transparency and does not necessarily indicate a bias. If you are in doubt about whether to list a relationship/activity/interest, it is preferable that you do so.

The author's relationships/activities/interests should be defined broadly. For example, if your manuscript pertains to the epidemiology of hypertension, you should declare all relationships with manufacturers of antihypertensive medication, even if that medication is not mentioned in the manuscript.

In item #1 below, report all support for the work reported in this manuscript without time limit. For all other items, the time frame for disclosure is the past 36 months.

|                                                           | Name all entities with whom you have this relationship or indicate none (add rows as needed)                                                                                   | Specifications/Comments (e.g., if payments were made to you or to your institution)                                                                                                                                          |  |  |  |  |  |  |
|-----------------------------------------------------------|--------------------------------------------------------------------------------------------------------------------------------------------------------------------------------|------------------------------------------------------------------------------------------------------------------------------------------------------------------------------------------------------------------------------|--|--|--|--|--|--|
| <b>Time frame: Since the initial planning of the work</b> |                                                                                                                                                                                |                                                                                                                                                                                                                              |  |  |  |  |  |  |
| <b>1</b>                                                  | All support for the present manuscript (e.g., funding, provision of study materials, medical writing, article processing charges, etc.)<br><b>No time limit for this item.</b> | <input checked="" type="checkbox"/> <b>None</b><br><table border="1"> <tr><td></td><td></td></tr> <tr><td></td><td></td></tr> <tr><td></td><td></td></tr> </table> <a href="#">Click the tab key to add additional rows.</a> |  |  |  |  |  |  |
|                                                           |                                                                                                                                                                                |                                                                                                                                                                                                                              |  |  |  |  |  |  |
|                                                           |                                                                                                                                                                                |                                                                                                                                                                                                                              |  |  |  |  |  |  |
|                                                           |                                                                                                                                                                                |                                                                                                                                                                                                                              |  |  |  |  |  |  |
| <b>Time frame: past 36 months</b>                         |                                                                                                                                                                                |                                                                                                                                                                                                                              |  |  |  |  |  |  |
| <b>2</b>                                                  | Grants or contracts from any entity (if not indicated in item #1 above).                                                                                                       | <input checked="" type="checkbox"/> <b>None</b><br><table border="1"> <tr><td></td><td></td></tr> <tr><td></td><td></td></tr> <tr><td></td><td></td></tr> </table>                                                           |  |  |  |  |  |  |
|                                                           |                                                                                                                                                                                |                                                                                                                                                                                                                              |  |  |  |  |  |  |
|                                                           |                                                                                                                                                                                |                                                                                                                                                                                                                              |  |  |  |  |  |  |
|                                                           |                                                                                                                                                                                |                                                                                                                                                                                                                              |  |  |  |  |  |  |
| <b>3</b>                                                  | Royalties or licenses                                                                                                                                                          | <input checked="" type="checkbox"/> <b>None</b><br><table border="1"> <tr><td></td><td></td></tr> <tr><td></td><td></td></tr> <tr><td></td><td></td></tr> </table>                                                           |  |  |  |  |  |  |
|                                                           |                                                                                                                                                                                |                                                                                                                                                                                                                              |  |  |  |  |  |  |
|                                                           |                                                                                                                                                                                |                                                                                                                                                                                                                              |  |  |  |  |  |  |
|                                                           |                                                                                                                                                                                |                                                                                                                                                                                                                              |  |  |  |  |  |  |

|                                         |                                                                                                              | Name all entities with whom you have this relationship or indicate none (add rows as needed)                                                                                               | Specifications/Comments (e.g., if payments were made to you or to your institution) |  |  |  |  |  |  |  |  |
|-----------------------------------------|--------------------------------------------------------------------------------------------------------------|--------------------------------------------------------------------------------------------------------------------------------------------------------------------------------------------|-------------------------------------------------------------------------------------|--|--|--|--|--|--|--|--|
| 4                                       | Consulting fees                                                                                              | <input checked="" type="checkbox"/> None<br><table border="1"> <tr><td></td><td></td></tr> <tr><td></td><td></td></tr> <tr><td></td><td></td></tr> <tr><td></td><td></td></tr> </table>    |                                                                                     |  |  |  |  |  |  |  |  |
|                                         |                                                                                                              |                                                                                                                                                                                            |                                                                                     |  |  |  |  |  |  |  |  |
|                                         |                                                                                                              |                                                                                                                                                                                            |                                                                                     |  |  |  |  |  |  |  |  |
|                                         |                                                                                                              |                                                                                                                                                                                            |                                                                                     |  |  |  |  |  |  |  |  |
|                                         |                                                                                                              |                                                                                                                                                                                            |                                                                                     |  |  |  |  |  |  |  |  |
| 5                                       | Payment or honoraria for lectures, presentations, speakers bureaus, manuscript writing or educational events | <input type="checkbox"/> None<br><table border="1"> <tr> <td>HONORARIA FOR LECTURES FOR MICROVENTION</td> <td></td> </tr> <tr><td></td><td></td></tr> <tr><td></td><td></td></tr> </table> | HONORARIA FOR LECTURES FOR MICROVENTION                                             |  |  |  |  |  |  |  |  |
| HONORARIA FOR LECTURES FOR MICROVENTION |                                                                                                              |                                                                                                                                                                                            |                                                                                     |  |  |  |  |  |  |  |  |
|                                         |                                                                                                              |                                                                                                                                                                                            |                                                                                     |  |  |  |  |  |  |  |  |
|                                         |                                                                                                              |                                                                                                                                                                                            |                                                                                     |  |  |  |  |  |  |  |  |
| 6                                       | Payment for expert testimony                                                                                 | <input checked="" type="checkbox"/> None<br><table border="1"> <tr><td></td><td></td></tr> <tr><td></td><td></td></tr> <tr><td></td><td></td></tr> </table>                                |                                                                                     |  |  |  |  |  |  |  |  |
|                                         |                                                                                                              |                                                                                                                                                                                            |                                                                                     |  |  |  |  |  |  |  |  |
|                                         |                                                                                                              |                                                                                                                                                                                            |                                                                                     |  |  |  |  |  |  |  |  |
|                                         |                                                                                                              |                                                                                                                                                                                            |                                                                                     |  |  |  |  |  |  |  |  |
| 7                                       | Support for attending meetings and/or travel                                                                 | <input checked="" type="checkbox"/> None<br><table border="1"> <tr><td></td><td></td></tr> <tr><td></td><td></td></tr> <tr><td></td><td></td></tr> </table>                                |                                                                                     |  |  |  |  |  |  |  |  |
|                                         |                                                                                                              |                                                                                                                                                                                            |                                                                                     |  |  |  |  |  |  |  |  |
|                                         |                                                                                                              |                                                                                                                                                                                            |                                                                                     |  |  |  |  |  |  |  |  |
|                                         |                                                                                                              |                                                                                                                                                                                            |                                                                                     |  |  |  |  |  |  |  |  |
| 8                                       | Patents planned, issued or pending                                                                           | <input checked="" type="checkbox"/> None<br><table border="1"> <tr><td></td><td></td></tr> <tr><td></td><td></td></tr> <tr><td></td><td></td></tr> </table>                                |                                                                                     |  |  |  |  |  |  |  |  |
|                                         |                                                                                                              |                                                                                                                                                                                            |                                                                                     |  |  |  |  |  |  |  |  |
|                                         |                                                                                                              |                                                                                                                                                                                            |                                                                                     |  |  |  |  |  |  |  |  |
|                                         |                                                                                                              |                                                                                                                                                                                            |                                                                                     |  |  |  |  |  |  |  |  |
| 9                                       | Participation on a Data Safety Monitoring Board or Advisory Board                                            | <input checked="" type="checkbox"/> None<br><table border="1"> <tr><td></td><td></td></tr> <tr><td></td><td></td></tr> <tr><td></td><td></td></tr> </table>                                |                                                                                     |  |  |  |  |  |  |  |  |
|                                         |                                                                                                              |                                                                                                                                                                                            |                                                                                     |  |  |  |  |  |  |  |  |
|                                         |                                                                                                              |                                                                                                                                                                                            |                                                                                     |  |  |  |  |  |  |  |  |
|                                         |                                                                                                              |                                                                                                                                                                                            |                                                                                     |  |  |  |  |  |  |  |  |
| 10                                      | Leadership or fiduciary role in other board, society, committee or advocacy group, paid or unpaid            | <input type="checkbox"/> None<br><table border="1"> <tr> <td>ESMINT BOARD</td> <td></td> </tr> <tr><td></td><td></td></tr> <tr><td></td><td></td></tr> </table>                            | ESMINT BOARD                                                                        |  |  |  |  |  |  |  |  |
| ESMINT BOARD                            |                                                                                                              |                                                                                                                                                                                            |                                                                                     |  |  |  |  |  |  |  |  |
|                                         |                                                                                                              |                                                                                                                                                                                            |                                                                                     |  |  |  |  |  |  |  |  |
|                                         |                                                                                                              |                                                                                                                                                                                            |                                                                                     |  |  |  |  |  |  |  |  |

|    |                                                                                  | Name all entities with whom you have this relationship or indicate none (add rows as needed)                                                                | Specifications/Comments (e.g., if payments were made to you or to your institution) |  |  |  |  |  |  |
|----|----------------------------------------------------------------------------------|-------------------------------------------------------------------------------------------------------------------------------------------------------------|-------------------------------------------------------------------------------------|--|--|--|--|--|--|
| 11 | Stock or stock options                                                           | <input checked="" type="checkbox"/> None<br><table border="1"> <tr><td></td><td></td></tr> <tr><td></td><td></td></tr> <tr><td></td><td></td></tr> </table> |                                                                                     |  |  |  |  |  |  |
|    |                                                                                  |                                                                                                                                                             |                                                                                     |  |  |  |  |  |  |
|    |                                                                                  |                                                                                                                                                             |                                                                                     |  |  |  |  |  |  |
|    |                                                                                  |                                                                                                                                                             |                                                                                     |  |  |  |  |  |  |
| 12 | Receipt of equipment, materials, drugs, medical writing, gifts or other services | <input checked="" type="checkbox"/> None<br><table border="1"> <tr><td></td><td></td></tr> <tr><td></td><td></td></tr> <tr><td></td><td></td></tr> </table> |                                                                                     |  |  |  |  |  |  |
|    |                                                                                  |                                                                                                                                                             |                                                                                     |  |  |  |  |  |  |
|    |                                                                                  |                                                                                                                                                             |                                                                                     |  |  |  |  |  |  |
|    |                                                                                  |                                                                                                                                                             |                                                                                     |  |  |  |  |  |  |
| 13 | Other financial or non-financial interests                                       | <input type="checkbox"/> None<br><table border="1"> <tr><td></td><td></td></tr> <tr><td></td><td></td></tr> <tr><td></td><td></td></tr> </table>            |                                                                                     |  |  |  |  |  |  |
|    |                                                                                  |                                                                                                                                                             |                                                                                     |  |  |  |  |  |  |
|    |                                                                                  |                                                                                                                                                             |                                                                                     |  |  |  |  |  |  |
|    |                                                                                  |                                                                                                                                                             |                                                                                     |  |  |  |  |  |  |

**Please place an "X" next to the following statement to indicate your agreement:**

☒ I certify that I have answered every question and have not altered the wording of any of the questions on this form.

## ICMJE DISCLOSURE FORM

**Date:** 1/10/2022

**Your Name:** Laurent Pierot

**Manuscript Title:** Aneurysm treatment with WEB in the combined population of two prospective, multicenter series: 5-year follow-up

**Manuscript Number (if known):** Neurintsurg-2021-018414

In the interest of transparency, we ask you to disclose all relationships/activities/interests listed below that are related to the content of your manuscript. "Related" means any relation with for-profit or not-for-profit third parties whose interests may be affected by the content of the manuscript. Disclosure represents a commitment to transparency and does not necessarily indicate a bias. If you are in doubt about whether to list a relationship/activity/interest, it is preferable that you do so.

The author's relationships/activities/interests should be defined broadly. For example, if your manuscript pertains to the epidemiology of hypertension, you should declare all relationships with manufacturers of antihypertensive medication, even if that medication is not mentioned in the manuscript.

In item #1 below, report all support for the work reported in this manuscript without time limit. For all other items, the time frame for disclosure is the past 36 months.

|                                                           | Name all entities with whom you have this relationship or indicate none (add rows as needed)                                                                                   | Specifications/Comments (e.g., if payments were made to you or to your institution)                                                                                                                                          |              |       |  |  |                                           |  |
|-----------------------------------------------------------|--------------------------------------------------------------------------------------------------------------------------------------------------------------------------------|------------------------------------------------------------------------------------------------------------------------------------------------------------------------------------------------------------------------------|--------------|-------|--|--|-------------------------------------------|--|
| <b>Time frame: Since the initial planning of the work</b> |                                                                                                                                                                                |                                                                                                                                                                                                                              |              |       |  |  |                                           |  |
| <b>1</b>                                                  | All support for the present manuscript (e.g., funding, provision of study materials, medical writing, article processing charges, etc.)<br><b>No time limit for this item.</b> | <input type="checkbox"/> <b>None</b><br><table border="1"> <tr> <td>Microvention</td> <td>To me</td> </tr> <tr> <td></td> <td></td> </tr> <tr> <td colspan="2">Click the tab key to add additional rows.</td> </tr> </table> | Microvention | To me |  |  | Click the tab key to add additional rows. |  |
| Microvention                                              | To me                                                                                                                                                                          |                                                                                                                                                                                                                              |              |       |  |  |                                           |  |
|                                                           |                                                                                                                                                                                |                                                                                                                                                                                                                              |              |       |  |  |                                           |  |
| Click the tab key to add additional rows.                 |                                                                                                                                                                                |                                                                                                                                                                                                                              |              |       |  |  |                                           |  |
| <b>Time frame: past 36 months</b>                         |                                                                                                                                                                                |                                                                                                                                                                                                                              |              |       |  |  |                                           |  |
| <b>2</b>                                                  | Grants or contracts from any entity (if not indicated in item #1 above).                                                                                                       | <input checked="" type="checkbox"/> <b>None</b><br><table border="1"> <tr> <td></td> <td></td> </tr> <tr> <td></td> <td></td> </tr> <tr> <td></td> <td></td> </tr> </table>                                                  |              |       |  |  |                                           |  |
|                                                           |                                                                                                                                                                                |                                                                                                                                                                                                                              |              |       |  |  |                                           |  |
|                                                           |                                                                                                                                                                                |                                                                                                                                                                                                                              |              |       |  |  |                                           |  |
|                                                           |                                                                                                                                                                                |                                                                                                                                                                                                                              |              |       |  |  |                                           |  |
| <b>3</b>                                                  | Royalties or licenses                                                                                                                                                          | <input checked="" type="checkbox"/> <b>None</b><br><table border="1"> <tr> <td></td> <td></td> </tr> <tr> <td></td> <td></td> </tr> <tr> <td></td> <td></td> </tr> </table>                                                  |              |       |  |  |                                           |  |
|                                                           |                                                                                                                                                                                |                                                                                                                                                                                                                              |              |       |  |  |                                           |  |
|                                                           |                                                                                                                                                                                |                                                                                                                                                                                                                              |              |       |  |  |                                           |  |
|                                                           |                                                                                                                                                                                |                                                                                                                                                                                                                              |              |       |  |  |                                           |  |

|                                              |                                                                                                              | Name all entities with whom you have this relationship or indicate none (add rows as needed)                                                                                                                                              | Specifications/Comments (e.g., if payments were made to you or to your institution) |                                              |       |  |  |  |  |  |  |
|----------------------------------------------|--------------------------------------------------------------------------------------------------------------|-------------------------------------------------------------------------------------------------------------------------------------------------------------------------------------------------------------------------------------------|-------------------------------------------------------------------------------------|----------------------------------------------|-------|--|--|--|--|--|--|
| 4                                            | Consulting fees                                                                                              | <input type="checkbox"/> None<br><table border="1"> <tr> <td>Balt, Microvention, Perflow, phenox, Vesalio</td> <td>To me</td> </tr> <tr> <td></td> <td></td> </tr> <tr> <td></td> <td></td> </tr> <tr> <td></td> <td></td> </tr> </table> |                                                                                     | Balt, Microvention, Perflow, phenox, Vesalio | To me |  |  |  |  |  |  |
| Balt, Microvention, Perflow, phenox, Vesalio | To me                                                                                                        |                                                                                                                                                                                                                                           |                                                                                     |                                              |       |  |  |  |  |  |  |
|                                              |                                                                                                              |                                                                                                                                                                                                                                           |                                                                                     |                                              |       |  |  |  |  |  |  |
|                                              |                                                                                                              |                                                                                                                                                                                                                                           |                                                                                     |                                              |       |  |  |  |  |  |  |
|                                              |                                                                                                              |                                                                                                                                                                                                                                           |                                                                                     |                                              |       |  |  |  |  |  |  |
| 5                                            | Payment or honoraria for lectures, presentations, speakers bureaus, manuscript writing or educational events | <input type="checkbox"/> None<br><table border="1"> <tr> <td>Balt, Microvention, Perflow, phenox, Vesalio</td> <td>To me</td> </tr> <tr> <td></td> <td></td> </tr> <tr> <td></td> <td></td> </tr> </table>                                |                                                                                     | Balt, Microvention, Perflow, phenox, Vesalio | To me |  |  |  |  |  |  |
| Balt, Microvention, Perflow, phenox, Vesalio | To me                                                                                                        |                                                                                                                                                                                                                                           |                                                                                     |                                              |       |  |  |  |  |  |  |
|                                              |                                                                                                              |                                                                                                                                                                                                                                           |                                                                                     |                                              |       |  |  |  |  |  |  |
|                                              |                                                                                                              |                                                                                                                                                                                                                                           |                                                                                     |                                              |       |  |  |  |  |  |  |
| 6                                            | Payment for expert testimony                                                                                 | <input checked="" type="checkbox"/> None<br><table border="1"> <tr> <td></td> <td></td> </tr> <tr> <td></td> <td></td> </tr> <tr> <td></td> <td></td> </tr> </table>                                                                      |                                                                                     |                                              |       |  |  |  |  |  |  |
|                                              |                                                                                                              |                                                                                                                                                                                                                                           |                                                                                     |                                              |       |  |  |  |  |  |  |
|                                              |                                                                                                              |                                                                                                                                                                                                                                           |                                                                                     |                                              |       |  |  |  |  |  |  |
|                                              |                                                                                                              |                                                                                                                                                                                                                                           |                                                                                     |                                              |       |  |  |  |  |  |  |
| 7                                            | Support for attending meetings and/or travel                                                                 | <input type="checkbox"/> None<br><table border="1"> <tr> <td>Balt, Microvention, phenox</td> <td></td> </tr> <tr> <td></td> <td></td> </tr> <tr> <td></td> <td></td> </tr> </table>                                                       |                                                                                     | Balt, Microvention, phenox                   |       |  |  |  |  |  |  |
| Balt, Microvention, phenox                   |                                                                                                              |                                                                                                                                                                                                                                           |                                                                                     |                                              |       |  |  |  |  |  |  |
|                                              |                                                                                                              |                                                                                                                                                                                                                                           |                                                                                     |                                              |       |  |  |  |  |  |  |
|                                              |                                                                                                              |                                                                                                                                                                                                                                           |                                                                                     |                                              |       |  |  |  |  |  |  |
| 8                                            | Patents planned, issued or pending                                                                           | <input checked="" type="checkbox"/> None<br><table border="1"> <tr> <td></td> <td></td> </tr> <tr> <td></td> <td></td> </tr> <tr> <td></td> <td></td> </tr> </table>                                                                      |                                                                                     |                                              |       |  |  |  |  |  |  |
|                                              |                                                                                                              |                                                                                                                                                                                                                                           |                                                                                     |                                              |       |  |  |  |  |  |  |
|                                              |                                                                                                              |                                                                                                                                                                                                                                           |                                                                                     |                                              |       |  |  |  |  |  |  |
|                                              |                                                                                                              |                                                                                                                                                                                                                                           |                                                                                     |                                              |       |  |  |  |  |  |  |
| 9                                            | Participation on a Data Safety Monitoring Board or Advisory Board                                            | <input checked="" type="checkbox"/> None<br><table border="1"> <tr> <td></td> <td></td> </tr> <tr> <td></td> <td></td> </tr> <tr> <td></td> <td></td> </tr> </table>                                                                      |                                                                                     |                                              |       |  |  |  |  |  |  |
|                                              |                                                                                                              |                                                                                                                                                                                                                                           |                                                                                     |                                              |       |  |  |  |  |  |  |
|                                              |                                                                                                              |                                                                                                                                                                                                                                           |                                                                                     |                                              |       |  |  |  |  |  |  |
|                                              |                                                                                                              |                                                                                                                                                                                                                                           |                                                                                     |                                              |       |  |  |  |  |  |  |
| 10                                           | Leadership or fiduciary role in other board, society, committee or advocacy group, paid or unpaid            | <input checked="" type="checkbox"/> None<br><table border="1"> <tr> <td></td> <td></td> </tr> <tr> <td></td> <td></td> </tr> <tr> <td></td> <td></td> </tr> </table>                                                                      |                                                                                     |                                              |       |  |  |  |  |  |  |
|                                              |                                                                                                              |                                                                                                                                                                                                                                           |                                                                                     |                                              |       |  |  |  |  |  |  |
|                                              |                                                                                                              |                                                                                                                                                                                                                                           |                                                                                     |                                              |       |  |  |  |  |  |  |
|                                              |                                                                                                              |                                                                                                                                                                                                                                           |                                                                                     |                                              |       |  |  |  |  |  |  |

|    |                                                                                  | Name all entities with whom you have this relationship or indicate none (add rows as needed)                                                                | Specifications/Comments (e.g., if payments were made to you or to your institution) |  |  |  |  |  |  |
|----|----------------------------------------------------------------------------------|-------------------------------------------------------------------------------------------------------------------------------------------------------------|-------------------------------------------------------------------------------------|--|--|--|--|--|--|
| 11 | Stock or stock options                                                           | <input checked="" type="checkbox"/> None<br><table border="1"> <tr><td></td><td></td></tr> <tr><td></td><td></td></tr> <tr><td></td><td></td></tr> </table> |                                                                                     |  |  |  |  |  |  |
|    |                                                                                  |                                                                                                                                                             |                                                                                     |  |  |  |  |  |  |
|    |                                                                                  |                                                                                                                                                             |                                                                                     |  |  |  |  |  |  |
|    |                                                                                  |                                                                                                                                                             |                                                                                     |  |  |  |  |  |  |
| 12 | Receipt of equipment, materials, drugs, medical writing, gifts or other services | <input checked="" type="checkbox"/> None<br><table border="1"> <tr><td></td><td></td></tr> <tr><td></td><td></td></tr> <tr><td></td><td></td></tr> </table> |                                                                                     |  |  |  |  |  |  |
|    |                                                                                  |                                                                                                                                                             |                                                                                     |  |  |  |  |  |  |
|    |                                                                                  |                                                                                                                                                             |                                                                                     |  |  |  |  |  |  |
|    |                                                                                  |                                                                                                                                                             |                                                                                     |  |  |  |  |  |  |
| 13 | Other financial or non-financial interests                                       | <input checked="" type="checkbox"/> None<br><table border="1"> <tr><td></td><td></td></tr> <tr><td></td><td></td></tr> <tr><td></td><td></td></tr> </table> |                                                                                     |  |  |  |  |  |  |
|    |                                                                                  |                                                                                                                                                             |                                                                                     |  |  |  |  |  |  |
|    |                                                                                  |                                                                                                                                                             |                                                                                     |  |  |  |  |  |  |
|    |                                                                                  |                                                                                                                                                             |                                                                                     |  |  |  |  |  |  |

**Please place an "X" next to the following statement to indicate your agreement:**

☒ I certify that I have answered every question and have not altered the wording of any of the questions on this form.

## ICMJE DISCLOSURE FORM

**Date:** 5/1/2022

**Your Name:** Istvan Szikora M.D., Ph.D.

**Manuscript Title:** Aneurysm treatment with WEB in the combined population of two prospective, multicenter series: 5-year follow-up

**Manuscript Number (if known):** Neurintsurg-2021-018414

In the interest of transparency, we ask you to disclose all relationships/activities/interests listed below that are related to the content of your manuscript. "Related" means any relation with for-profit or not-for-profit third parties whose interests may be affected by the content of the manuscript. Disclosure represents a commitment to transparency and does not necessarily indicate a bias. If you are in doubt about whether to list a relationship/activity/interest, it is preferable that you do so.

The author's relationships/activities/interests should be defined broadly. For example, if your manuscript pertains to the epidemiology of hypertension, you should declare all relationships with manufacturers of antihypertensive medication, even if that medication is not mentioned in the manuscript.

In item #1 below, report all support for the work reported in this manuscript without time limit. For all other items, the time frame for disclosure is the past 36 months.

|                                                           | Name all entities with whom you have this relationship or indicate none (add rows as needed)                                                                                   | Specifications/Comments (e.g., if payments were made to you or to your institution)                                                                                                                         |                                       |  |  |  |  |                                           |
|-----------------------------------------------------------|--------------------------------------------------------------------------------------------------------------------------------------------------------------------------------|-------------------------------------------------------------------------------------------------------------------------------------------------------------------------------------------------------------|---------------------------------------|--|--|--|--|-------------------------------------------|
| <b>Time frame: Since the initial planning of the work</b> |                                                                                                                                                                                |                                                                                                                                                                                                             |                                       |  |  |  |  |                                           |
| <b>1</b>                                                  | All support for the present manuscript (e.g., funding, provision of study materials, medical writing, article processing charges, etc.)<br><b>No time limit for this item.</b> | <input checked="" type="checkbox"/> <b>None</b><br><table border="1"> <tr><td></td><td></td></tr> <tr><td></td><td></td></tr> <tr><td></td><td>Click the tab key to add additional rows.</td></tr> </table> |                                       |  |  |  |  | Click the tab key to add additional rows. |
|                                                           |                                                                                                                                                                                |                                                                                                                                                                                                             |                                       |  |  |  |  |                                           |
|                                                           |                                                                                                                                                                                |                                                                                                                                                                                                             |                                       |  |  |  |  |                                           |
|                                                           | Click the tab key to add additional rows.                                                                                                                                      |                                                                                                                                                                                                             |                                       |  |  |  |  |                                           |
| <b>Time frame: past 36 months</b>                         |                                                                                                                                                                                |                                                                                                                                                                                                             |                                       |  |  |  |  |                                           |
| <b>2</b>                                                  | Grants or contracts from any entity (if not indicated in item #1 above).                                                                                                       | <input type="checkbox"/> <b>None</b><br><table border="1"> <tr><td>National Brain Research Fund, Hungary</td><td></td></tr> <tr><td></td><td></td></tr> <tr><td></td><td></td></tr> </table>                | National Brain Research Fund, Hungary |  |  |  |  |                                           |
| National Brain Research Fund, Hungary                     |                                                                                                                                                                                |                                                                                                                                                                                                             |                                       |  |  |  |  |                                           |
|                                                           |                                                                                                                                                                                |                                                                                                                                                                                                             |                                       |  |  |  |  |                                           |
|                                                           |                                                                                                                                                                                |                                                                                                                                                                                                             |                                       |  |  |  |  |                                           |
| <b>3</b>                                                  | Royalties or licenses                                                                                                                                                          | <input checked="" type="checkbox"/> <b>None</b><br><table border="1"> <tr><td></td><td></td></tr> <tr><td></td><td></td></tr> <tr><td></td><td></td></tr> </table>                                          |                                       |  |  |  |  |                                           |
|                                                           |                                                                                                                                                                                |                                                                                                                                                                                                             |                                       |  |  |  |  |                                           |
|                                                           |                                                                                                                                                                                |                                                                                                                                                                                                             |                                       |  |  |  |  |                                           |
|                                                           |                                                                                                                                                                                |                                                                                                                                                                                                             |                                       |  |  |  |  |                                           |

|                                                                                                                                              |                                                                                                              | Name all entities with whom you have this relationship or indicate none (add rows as needed)                                                                                                                                                                                                          | Specifications/Comments (e.g., if payments were made to you or to your institution)                                                          |  |  |  |  |  |  |  |  |
|----------------------------------------------------------------------------------------------------------------------------------------------|--------------------------------------------------------------------------------------------------------------|-------------------------------------------------------------------------------------------------------------------------------------------------------------------------------------------------------------------------------------------------------------------------------------------------------|----------------------------------------------------------------------------------------------------------------------------------------------|--|--|--|--|--|--|--|--|
| 4                                                                                                                                            | Consulting fees                                                                                              | <input type="checkbox"/> None<br><table border="1"> <tr> <td>Stryker, Microvention, Medtronic, CERENOVUS</td> <td></td> </tr> <tr> <td></td> <td></td> </tr> <tr> <td></td> <td></td> </tr> <tr> <td></td> <td></td> </tr> </table>                                                                   | Stryker, Microvention, Medtronic, CERENOVUS                                                                                                  |  |  |  |  |  |  |  |  |
| Stryker, Microvention, Medtronic, CERENOVUS                                                                                                  |                                                                                                              |                                                                                                                                                                                                                                                                                                       |                                                                                                                                              |  |  |  |  |  |  |  |  |
|                                                                                                                                              |                                                                                                              |                                                                                                                                                                                                                                                                                                       |                                                                                                                                              |  |  |  |  |  |  |  |  |
|                                                                                                                                              |                                                                                                              |                                                                                                                                                                                                                                                                                                       |                                                                                                                                              |  |  |  |  |  |  |  |  |
|                                                                                                                                              |                                                                                                              |                                                                                                                                                                                                                                                                                                       |                                                                                                                                              |  |  |  |  |  |  |  |  |
| 5                                                                                                                                            | Payment or honoraria for lectures, presentations, speakers bureaus, manuscript writing or educational events | <input type="checkbox"/> None<br><table border="1"> <tr> <td>Medtronic, Stryker, CERENOVUS</td> <td></td> </tr> <tr> <td></td> <td></td> </tr> <tr> <td></td> <td></td> </tr> </table>                                                                                                                | Medtronic, Stryker, CERENOVUS                                                                                                                |  |  |  |  |  |  |  |  |
| Medtronic, Stryker, CERENOVUS                                                                                                                |                                                                                                              |                                                                                                                                                                                                                                                                                                       |                                                                                                                                              |  |  |  |  |  |  |  |  |
|                                                                                                                                              |                                                                                                              |                                                                                                                                                                                                                                                                                                       |                                                                                                                                              |  |  |  |  |  |  |  |  |
|                                                                                                                                              |                                                                                                              |                                                                                                                                                                                                                                                                                                       |                                                                                                                                              |  |  |  |  |  |  |  |  |
| 6                                                                                                                                            | Payment for expert testimony                                                                                 | <input checked="" type="checkbox"/> None<br><table border="1"> <tr> <td></td> <td></td> </tr> <tr> <td></td> <td></td> </tr> <tr> <td></td> <td></td> </tr> </table>                                                                                                                                  |                                                                                                                                              |  |  |  |  |  |  |  |  |
|                                                                                                                                              |                                                                                                              |                                                                                                                                                                                                                                                                                                       |                                                                                                                                              |  |  |  |  |  |  |  |  |
|                                                                                                                                              |                                                                                                              |                                                                                                                                                                                                                                                                                                       |                                                                                                                                              |  |  |  |  |  |  |  |  |
|                                                                                                                                              |                                                                                                              |                                                                                                                                                                                                                                                                                                       |                                                                                                                                              |  |  |  |  |  |  |  |  |
| 7                                                                                                                                            | Support for attending meetings and/or travel                                                                 | <input type="checkbox"/> None<br><table border="1"> <tr> <td>Gabriel Vegh Neurointerventional Foundation, Hungary</td> <td></td> </tr> <tr> <td></td> <td></td> </tr> <tr> <td></td> <td></td> </tr> </table>                                                                                         | Gabriel Vegh Neurointerventional Foundation, Hungary                                                                                         |  |  |  |  |  |  |  |  |
| Gabriel Vegh Neurointerventional Foundation, Hungary                                                                                         |                                                                                                              |                                                                                                                                                                                                                                                                                                       |                                                                                                                                              |  |  |  |  |  |  |  |  |
|                                                                                                                                              |                                                                                                              |                                                                                                                                                                                                                                                                                                       |                                                                                                                                              |  |  |  |  |  |  |  |  |
|                                                                                                                                              |                                                                                                              |                                                                                                                                                                                                                                                                                                       |                                                                                                                                              |  |  |  |  |  |  |  |  |
| 8                                                                                                                                            | Patents planned, issued or pending                                                                           | <input checked="" type="checkbox"/> None<br><table border="1"> <tr> <td></td> <td></td> </tr> <tr> <td></td> <td></td> </tr> <tr> <td></td> <td></td> </tr> </table>                                                                                                                                  |                                                                                                                                              |  |  |  |  |  |  |  |  |
|                                                                                                                                              |                                                                                                              |                                                                                                                                                                                                                                                                                                       |                                                                                                                                              |  |  |  |  |  |  |  |  |
|                                                                                                                                              |                                                                                                              |                                                                                                                                                                                                                                                                                                       |                                                                                                                                              |  |  |  |  |  |  |  |  |
|                                                                                                                                              |                                                                                                              |                                                                                                                                                                                                                                                                                                       |                                                                                                                                              |  |  |  |  |  |  |  |  |
| 9                                                                                                                                            | Participation on a Data Safety Monitoring Board or Advisory Board                                            | <input checked="" type="checkbox"/> None<br><table border="1"> <tr> <td></td> <td></td> </tr> <tr> <td></td> <td></td> </tr> <tr> <td></td> <td></td> </tr> </table>                                                                                                                                  |                                                                                                                                              |  |  |  |  |  |  |  |  |
|                                                                                                                                              |                                                                                                              |                                                                                                                                                                                                                                                                                                       |                                                                                                                                              |  |  |  |  |  |  |  |  |
|                                                                                                                                              |                                                                                                              |                                                                                                                                                                                                                                                                                                       |                                                                                                                                              |  |  |  |  |  |  |  |  |
|                                                                                                                                              |                                                                                                              |                                                                                                                                                                                                                                                                                                       |                                                                                                                                              |  |  |  |  |  |  |  |  |
| 10                                                                                                                                           | Leadership or fiduciary role in other board, society, committee or advocacy group, paid or unpaid            | <input type="checkbox"/> None<br><table border="1"> <tr> <td>European board of Neurointervention (EBNI), Hungarian Society of Neuroradiology, Hungarian Society of Neurosurgery, Hungarian Stroke Society</td> <td></td> </tr> <tr> <td></td> <td></td> </tr> <tr> <td></td> <td></td> </tr> </table> | European board of Neurointervention (EBNI), Hungarian Society of Neuroradiology, Hungarian Society of Neurosurgery, Hungarian Stroke Society |  |  |  |  |  |  |  |  |
| European board of Neurointervention (EBNI), Hungarian Society of Neuroradiology, Hungarian Society of Neurosurgery, Hungarian Stroke Society |                                                                                                              |                                                                                                                                                                                                                                                                                                       |                                                                                                                                              |  |  |  |  |  |  |  |  |
|                                                                                                                                              |                                                                                                              |                                                                                                                                                                                                                                                                                                       |                                                                                                                                              |  |  |  |  |  |  |  |  |
|                                                                                                                                              |                                                                                                              |                                                                                                                                                                                                                                                                                                       |                                                                                                                                              |  |  |  |  |  |  |  |  |



|    |                                                                                  | Name all entities with whom you have this relationship or indicate none (add rows as needed)                                                                | Specifications/Comments (e.g., if payments were made to you or to your institution) |  |  |  |  |  |  |
|----|----------------------------------------------------------------------------------|-------------------------------------------------------------------------------------------------------------------------------------------------------------|-------------------------------------------------------------------------------------|--|--|--|--|--|--|
| 11 | Stock or stock options                                                           | <input checked="" type="checkbox"/> None<br><table border="1"> <tr><td></td><td></td></tr> <tr><td></td><td></td></tr> <tr><td></td><td></td></tr> </table> |                                                                                     |  |  |  |  |  |  |
|    |                                                                                  |                                                                                                                                                             |                                                                                     |  |  |  |  |  |  |
|    |                                                                                  |                                                                                                                                                             |                                                                                     |  |  |  |  |  |  |
|    |                                                                                  |                                                                                                                                                             |                                                                                     |  |  |  |  |  |  |
| 12 | Receipt of equipment, materials, drugs, medical writing, gifts or other services | <input checked="" type="checkbox"/> None<br><table border="1"> <tr><td></td><td></td></tr> <tr><td></td><td></td></tr> <tr><td></td><td></td></tr> </table> |                                                                                     |  |  |  |  |  |  |
|    |                                                                                  |                                                                                                                                                             |                                                                                     |  |  |  |  |  |  |
|    |                                                                                  |                                                                                                                                                             |                                                                                     |  |  |  |  |  |  |
|    |                                                                                  |                                                                                                                                                             |                                                                                     |  |  |  |  |  |  |
| 13 | Other financial or non-financial interests                                       | <input checked="" type="checkbox"/> None<br><table border="1"> <tr><td></td><td></td></tr> <tr><td></td><td></td></tr> <tr><td></td><td></td></tr> </table> |                                                                                     |  |  |  |  |  |  |
|    |                                                                                  |                                                                                                                                                             |                                                                                     |  |  |  |  |  |  |
|    |                                                                                  |                                                                                                                                                             |                                                                                     |  |  |  |  |  |  |
|    |                                                                                  |                                                                                                                                                             |                                                                                     |  |  |  |  |  |  |

**Please place an "X" next to the following statement to indicate your agreement:**

☒ I certify that I have answered every question and have not altered the wording of any of the questions on this form.

## ICMJE DISCLOSURE FORM

**Date:** 11/10/2021

**Your Name:** Jacques MORET

**Manuscript Title:** Aneurysm treatment with WEB in the combined population of two prospective, multicenter series: 5-year follow-up

**Manuscript Number (if known):** [Click or tap here to enter text.](#)

In the interest of transparency, we ask you to disclose all relationships/activities/interests listed below that are related to the content of your manuscript. "Related" means any relation with for-profit or not-for-profit third parties whose interests may be affected by the content of the manuscript. Disclosure represents a commitment to transparency and does not necessarily indicate a bias. If you are in doubt about whether to list a relationship/activity/interest, it is preferable that you do so.

The author's relationships/activities/interests should be defined broadly. For example, if your manuscript pertains to the epidemiology of hypertension, you should declare all relationships with manufacturers of antihypertensive medication, even if that medication is not mentioned in the manuscript.

In item #1 below, report all support for the work reported in this manuscript without time limit. For all other items, the time frame for disclosure is the past 36 months.

|                                                           | Name all entities with whom you have this relationship or indicate none (add rows as needed)                                                                                   | Specifications/Comments (e.g., if payments were made to you or to your institution)                                                                                                                          |  |  |  |  |  |  |
|-----------------------------------------------------------|--------------------------------------------------------------------------------------------------------------------------------------------------------------------------------|--------------------------------------------------------------------------------------------------------------------------------------------------------------------------------------------------------------|--|--|--|--|--|--|
| <b>Time frame: Since the initial planning of the work</b> |                                                                                                                                                                                |                                                                                                                                                                                                              |  |  |  |  |  |  |
| <b>1</b>                                                  | All support for the present manuscript (e.g., funding, provision of study materials, medical writing, article processing charges, etc.)<br><b>No time limit for this item.</b> | <input checked="" type="checkbox"/> <b>None</b><br><table border="1"> <tr><td></td><td></td></tr> <tr><td></td><td></td></tr> <tr><td></td><td></td></tr> </table> Click the tab key to add additional rows. |  |  |  |  |  |  |
|                                                           |                                                                                                                                                                                |                                                                                                                                                                                                              |  |  |  |  |  |  |
|                                                           |                                                                                                                                                                                |                                                                                                                                                                                                              |  |  |  |  |  |  |
|                                                           |                                                                                                                                                                                |                                                                                                                                                                                                              |  |  |  |  |  |  |
| <b>Time frame: past 36 months</b>                         |                                                                                                                                                                                |                                                                                                                                                                                                              |  |  |  |  |  |  |
| <b>2</b>                                                  | Grants or contracts from any entity (if not indicated in item #1 above).                                                                                                       | <input checked="" type="checkbox"/> <b>None</b><br><table border="1"> <tr><td></td><td></td></tr> <tr><td></td><td></td></tr> <tr><td></td><td></td></tr> </table>                                           |  |  |  |  |  |  |
|                                                           |                                                                                                                                                                                |                                                                                                                                                                                                              |  |  |  |  |  |  |
|                                                           |                                                                                                                                                                                |                                                                                                                                                                                                              |  |  |  |  |  |  |
|                                                           |                                                                                                                                                                                |                                                                                                                                                                                                              |  |  |  |  |  |  |
| <b>3</b>                                                  | Royalties or licenses                                                                                                                                                          | <input checked="" type="checkbox"/> <b>None</b><br><table border="1"> <tr><td></td><td></td></tr> <tr><td></td><td></td></tr> <tr><td></td><td></td></tr> </table>                                           |  |  |  |  |  |  |
|                                                           |                                                                                                                                                                                |                                                                                                                                                                                                              |  |  |  |  |  |  |
|                                                           |                                                                                                                                                                                |                                                                                                                                                                                                              |  |  |  |  |  |  |
|                                                           |                                                                                                                                                                                |                                                                                                                                                                                                              |  |  |  |  |  |  |

|              |                                                                                                              | Name all entities with whom you have this relationship or indicate none (add rows as needed)                                                                                                              | Specifications/Comments (e.g., if payments were made to you or to your institution) |       |  |  |  |  |  |  |  |
|--------------|--------------------------------------------------------------------------------------------------------------|-----------------------------------------------------------------------------------------------------------------------------------------------------------------------------------------------------------|-------------------------------------------------------------------------------------|-------|--|--|--|--|--|--|--|
| 4            | Consulting fees                                                                                              | <input type="checkbox"/> None<br><table border="1"> <tr> <td>Microvention</td> <td>To me</td> </tr> <tr> <td></td> <td></td> </tr> <tr> <td></td> <td></td> </tr> <tr> <td></td> <td></td> </tr> </table> | Microvention                                                                        | To me |  |  |  |  |  |  |  |
| Microvention | To me                                                                                                        |                                                                                                                                                                                                           |                                                                                     |       |  |  |  |  |  |  |  |
|              |                                                                                                              |                                                                                                                                                                                                           |                                                                                     |       |  |  |  |  |  |  |  |
|              |                                                                                                              |                                                                                                                                                                                                           |                                                                                     |       |  |  |  |  |  |  |  |
|              |                                                                                                              |                                                                                                                                                                                                           |                                                                                     |       |  |  |  |  |  |  |  |
| 5            | Payment or honoraria for lectures, presentations, speakers bureaus, manuscript writing or educational events | <input checked="" type="checkbox"/> None<br><table border="1"> <tr> <td></td> <td></td> </tr> <tr> <td></td> <td></td> </tr> <tr> <td></td> <td></td> </tr> </table>                                      |                                                                                     |       |  |  |  |  |  |  |  |
|              |                                                                                                              |                                                                                                                                                                                                           |                                                                                     |       |  |  |  |  |  |  |  |
|              |                                                                                                              |                                                                                                                                                                                                           |                                                                                     |       |  |  |  |  |  |  |  |
|              |                                                                                                              |                                                                                                                                                                                                           |                                                                                     |       |  |  |  |  |  |  |  |
| 6            | Payment for expert testimony                                                                                 | <input checked="" type="checkbox"/> None<br><table border="1"> <tr> <td></td> <td></td> </tr> <tr> <td></td> <td></td> </tr> <tr> <td></td> <td></td> </tr> </table>                                      |                                                                                     |       |  |  |  |  |  |  |  |
|              |                                                                                                              |                                                                                                                                                                                                           |                                                                                     |       |  |  |  |  |  |  |  |
|              |                                                                                                              |                                                                                                                                                                                                           |                                                                                     |       |  |  |  |  |  |  |  |
|              |                                                                                                              |                                                                                                                                                                                                           |                                                                                     |       |  |  |  |  |  |  |  |
| 7            | Support for attending meetings and/or travel                                                                 | <input checked="" type="checkbox"/> None<br><table border="1"> <tr> <td></td> <td></td> </tr> <tr> <td></td> <td></td> </tr> <tr> <td></td> <td></td> </tr> </table>                                      |                                                                                     |       |  |  |  |  |  |  |  |
|              |                                                                                                              |                                                                                                                                                                                                           |                                                                                     |       |  |  |  |  |  |  |  |
|              |                                                                                                              |                                                                                                                                                                                                           |                                                                                     |       |  |  |  |  |  |  |  |
|              |                                                                                                              |                                                                                                                                                                                                           |                                                                                     |       |  |  |  |  |  |  |  |
| 8            | Patents planned, issued or pending                                                                           | <input checked="" type="checkbox"/> None<br><table border="1"> <tr> <td></td> <td></td> </tr> <tr> <td></td> <td></td> </tr> <tr> <td></td> <td></td> </tr> </table>                                      |                                                                                     |       |  |  |  |  |  |  |  |
|              |                                                                                                              |                                                                                                                                                                                                           |                                                                                     |       |  |  |  |  |  |  |  |
|              |                                                                                                              |                                                                                                                                                                                                           |                                                                                     |       |  |  |  |  |  |  |  |
|              |                                                                                                              |                                                                                                                                                                                                           |                                                                                     |       |  |  |  |  |  |  |  |
| 9            | Participation on a Data Safety Monitoring Board or Advisory Board                                            | <input checked="" type="checkbox"/> None<br><table border="1"> <tr> <td></td> <td></td> </tr> <tr> <td></td> <td></td> </tr> <tr> <td></td> <td></td> </tr> </table>                                      |                                                                                     |       |  |  |  |  |  |  |  |
|              |                                                                                                              |                                                                                                                                                                                                           |                                                                                     |       |  |  |  |  |  |  |  |
|              |                                                                                                              |                                                                                                                                                                                                           |                                                                                     |       |  |  |  |  |  |  |  |
|              |                                                                                                              |                                                                                                                                                                                                           |                                                                                     |       |  |  |  |  |  |  |  |
| 10           | Leadership or fiduciary role in other board, society, committee or advocacy group, paid or unpaid            | <input checked="" type="checkbox"/> None<br><table border="1"> <tr> <td></td> <td></td> </tr> <tr> <td></td> <td></td> </tr> <tr> <td></td> <td></td> </tr> </table>                                      |                                                                                     |       |  |  |  |  |  |  |  |
|              |                                                                                                              |                                                                                                                                                                                                           |                                                                                     |       |  |  |  |  |  |  |  |
|              |                                                                                                              |                                                                                                                                                                                                           |                                                                                     |       |  |  |  |  |  |  |  |
|              |                                                                                                              |                                                                                                                                                                                                           |                                                                                     |       |  |  |  |  |  |  |  |

|                                                                                                                                                                                                                                                               |                                                                                  | Name all entities with whom you have this relationship or indicate none (add rows as needed)                                                                            | Specifications/Comments (e.g., if payments were made to you or to your institution) |       |  |  |  |  |  |
|---------------------------------------------------------------------------------------------------------------------------------------------------------------------------------------------------------------------------------------------------------------|----------------------------------------------------------------------------------|-------------------------------------------------------------------------------------------------------------------------------------------------------------------------|-------------------------------------------------------------------------------------|-------|--|--|--|--|--|
| 11                                                                                                                                                                                                                                                            | Stock or stock options                                                           | <input checked="" type="checkbox"/> None<br><table border="1"> <tr><td></td><td></td></tr> <tr><td></td><td></td></tr> <tr><td></td><td></td></tr> </table>             |                                                                                     |       |  |  |  |  |  |
|                                                                                                                                                                                                                                                               |                                                                                  |                                                                                                                                                                         |                                                                                     |       |  |  |  |  |  |
|                                                                                                                                                                                                                                                               |                                                                                  |                                                                                                                                                                         |                                                                                     |       |  |  |  |  |  |
|                                                                                                                                                                                                                                                               |                                                                                  |                                                                                                                                                                         |                                                                                     |       |  |  |  |  |  |
| 12                                                                                                                                                                                                                                                            | Receipt of equipment, materials, drugs, medical writing, gifts or other services | <input checked="" type="checkbox"/> None<br><table border="1"> <tr><td></td><td></td></tr> <tr><td></td><td></td></tr> <tr><td></td><td></td></tr> </table>             |                                                                                     |       |  |  |  |  |  |
|                                                                                                                                                                                                                                                               |                                                                                  |                                                                                                                                                                         |                                                                                     |       |  |  |  |  |  |
|                                                                                                                                                                                                                                                               |                                                                                  |                                                                                                                                                                         |                                                                                     |       |  |  |  |  |  |
|                                                                                                                                                                                                                                                               |                                                                                  |                                                                                                                                                                         |                                                                                     |       |  |  |  |  |  |
| 13                                                                                                                                                                                                                                                            | Other financial or non-financial interests                                       | <input type="checkbox"/> None<br><table border="1"> <tr> <td>Consulting BALT</td> <td>To me</td> </tr> <tr><td></td><td></td></tr> <tr><td></td><td></td></tr> </table> | Consulting BALT                                                                     | To me |  |  |  |  |  |
| Consulting BALT                                                                                                                                                                                                                                               | To me                                                                            |                                                                                                                                                                         |                                                                                     |       |  |  |  |  |  |
|                                                                                                                                                                                                                                                               |                                                                                  |                                                                                                                                                                         |                                                                                     |       |  |  |  |  |  |
|                                                                                                                                                                                                                                                               |                                                                                  |                                                                                                                                                                         |                                                                                     |       |  |  |  |  |  |
| <p><b>Please place an "X" next to the following statement to indicate your agreement:</b></p> <p><input checked="" type="checkbox"/> I certify that I have answered every question and have not altered the wording of any of the questions on this form.</p> |                                                                                  |                                                                                                                                                                         |                                                                                     |       |  |  |  |  |  |

## ICMJE DISCLOSURE FORM

**Date:** 1/10/2022

**Your Name:** STOCKX LUC

**Manuscript Title:** Aneurysm treatment with WEB in the combined population of two prospective, multicenter series: 5-year follow-up

**Manuscript Number (if known):** [Click or tap here to enter text.](#)

In the interest of transparency, we ask you to disclose all relationships/activities/interests listed below that are related to the content of your manuscript. "Related" means any relation with for-profit or not-for-profit third parties whose interests may be affected by the content of the manuscript. Disclosure represents a commitment to transparency and does not necessarily indicate a bias. If you are in doubt about whether to list a relationship/activity/interest, it is preferable that you do so.

The author's relationships/activities/interests should be defined broadly. For example, if your manuscript pertains to the epidemiology of hypertension, you should declare all relationships with manufacturers of antihypertensive medication, even if that medication is not mentioned in the manuscript.

In item #1 below, report all support for the work reported in this manuscript without time limit. For all other items, the time frame for disclosure is the past 36 months.

|                                                           | Name all entities with whom you have this relationship or indicate none (add rows as needed)                                                                                   | Specifications/Comments (e.g., if payments were made to you or to your institution)                                                                                                                          |  |  |  |  |  |  |
|-----------------------------------------------------------|--------------------------------------------------------------------------------------------------------------------------------------------------------------------------------|--------------------------------------------------------------------------------------------------------------------------------------------------------------------------------------------------------------|--|--|--|--|--|--|
| <b>Time frame: Since the initial planning of the work</b> |                                                                                                                                                                                |                                                                                                                                                                                                              |  |  |  |  |  |  |
| <b>1</b>                                                  | All support for the present manuscript (e.g., funding, provision of study materials, medical writing, article processing charges, etc.)<br><b>No time limit for this item.</b> | <input checked="" type="checkbox"/> <b>None</b><br><table border="1"> <tr><td></td><td></td></tr> <tr><td></td><td></td></tr> <tr><td></td><td></td></tr> </table> Click the tab key to add additional rows. |  |  |  |  |  |  |
|                                                           |                                                                                                                                                                                |                                                                                                                                                                                                              |  |  |  |  |  |  |
|                                                           |                                                                                                                                                                                |                                                                                                                                                                                                              |  |  |  |  |  |  |
|                                                           |                                                                                                                                                                                |                                                                                                                                                                                                              |  |  |  |  |  |  |
| <b>Time frame: past 36 months</b>                         |                                                                                                                                                                                |                                                                                                                                                                                                              |  |  |  |  |  |  |
| <b>2</b>                                                  | Grants or contracts from any entity (if not indicated in item #1 above).                                                                                                       | <input checked="" type="checkbox"/> <b>None</b><br><table border="1"> <tr><td></td><td></td></tr> <tr><td></td><td></td></tr> <tr><td></td><td></td></tr> </table>                                           |  |  |  |  |  |  |
|                                                           |                                                                                                                                                                                |                                                                                                                                                                                                              |  |  |  |  |  |  |
|                                                           |                                                                                                                                                                                |                                                                                                                                                                                                              |  |  |  |  |  |  |
|                                                           |                                                                                                                                                                                |                                                                                                                                                                                                              |  |  |  |  |  |  |
| <b>3</b>                                                  | Royalties or licenses                                                                                                                                                          | <input type="checkbox"/> <b>None</b><br><table border="1"> <tr><td></td><td></td></tr> <tr><td></td><td></td></tr> <tr><td></td><td></td></tr> </table>                                                      |  |  |  |  |  |  |
|                                                           |                                                                                                                                                                                |                                                                                                                                                                                                              |  |  |  |  |  |  |
|                                                           |                                                                                                                                                                                |                                                                                                                                                                                                              |  |  |  |  |  |  |
|                                                           |                                                                                                                                                                                |                                                                                                                                                                                                              |  |  |  |  |  |  |

|    |                                                                                                              | Name all entities with whom you have this relationship or indicate none (add rows as needed)                                                                                            | Specifications/Comments (e.g., if payments were made to you or to your institution) |  |  |  |  |  |  |  |  |
|----|--------------------------------------------------------------------------------------------------------------|-----------------------------------------------------------------------------------------------------------------------------------------------------------------------------------------|-------------------------------------------------------------------------------------|--|--|--|--|--|--|--|--|
| 4  | Consulting fees                                                                                              | <input checked="" type="checkbox"/> None<br><table border="1"> <tr><td></td><td></td></tr> <tr><td></td><td></td></tr> <tr><td></td><td></td></tr> <tr><td></td><td></td></tr> </table> |                                                                                     |  |  |  |  |  |  |  |  |
|    |                                                                                                              |                                                                                                                                                                                         |                                                                                     |  |  |  |  |  |  |  |  |
|    |                                                                                                              |                                                                                                                                                                                         |                                                                                     |  |  |  |  |  |  |  |  |
|    |                                                                                                              |                                                                                                                                                                                         |                                                                                     |  |  |  |  |  |  |  |  |
|    |                                                                                                              |                                                                                                                                                                                         |                                                                                     |  |  |  |  |  |  |  |  |
| 5  | Payment or honoraria for lectures, presentations, speakers bureaus, manuscript writing or educational events | <input checked="" type="checkbox"/> None<br><table border="1"> <tr><td></td><td></td></tr> <tr><td></td><td></td></tr> <tr><td></td><td></td></tr> </table>                             |                                                                                     |  |  |  |  |  |  |  |  |
|    |                                                                                                              |                                                                                                                                                                                         |                                                                                     |  |  |  |  |  |  |  |  |
|    |                                                                                                              |                                                                                                                                                                                         |                                                                                     |  |  |  |  |  |  |  |  |
|    |                                                                                                              |                                                                                                                                                                                         |                                                                                     |  |  |  |  |  |  |  |  |
| 6  | Payment for expert testimony                                                                                 | <input checked="" type="checkbox"/> None<br><table border="1"> <tr><td></td><td></td></tr> <tr><td></td><td></td></tr> <tr><td></td><td></td></tr> </table>                             |                                                                                     |  |  |  |  |  |  |  |  |
|    |                                                                                                              |                                                                                                                                                                                         |                                                                                     |  |  |  |  |  |  |  |  |
|    |                                                                                                              |                                                                                                                                                                                         |                                                                                     |  |  |  |  |  |  |  |  |
|    |                                                                                                              |                                                                                                                                                                                         |                                                                                     |  |  |  |  |  |  |  |  |
| 7  | Support for attending meetings and/or travel                                                                 | <input checked="" type="checkbox"/> None<br><table border="1"> <tr><td></td><td></td></tr> <tr><td></td><td></td></tr> <tr><td></td><td></td></tr> </table>                             |                                                                                     |  |  |  |  |  |  |  |  |
|    |                                                                                                              |                                                                                                                                                                                         |                                                                                     |  |  |  |  |  |  |  |  |
|    |                                                                                                              |                                                                                                                                                                                         |                                                                                     |  |  |  |  |  |  |  |  |
|    |                                                                                                              |                                                                                                                                                                                         |                                                                                     |  |  |  |  |  |  |  |  |
| 8  | Patents planned, issued or pending                                                                           | <input checked="" type="checkbox"/> None<br><table border="1"> <tr><td></td><td></td></tr> <tr><td></td><td></td></tr> <tr><td></td><td></td></tr> </table>                             |                                                                                     |  |  |  |  |  |  |  |  |
|    |                                                                                                              |                                                                                                                                                                                         |                                                                                     |  |  |  |  |  |  |  |  |
|    |                                                                                                              |                                                                                                                                                                                         |                                                                                     |  |  |  |  |  |  |  |  |
|    |                                                                                                              |                                                                                                                                                                                         |                                                                                     |  |  |  |  |  |  |  |  |
| 9  | Participation on a Data Safety Monitoring Board or Advisory Board                                            | <input checked="" type="checkbox"/> None<br><table border="1"> <tr><td></td><td></td></tr> <tr><td></td><td></td></tr> <tr><td></td><td></td></tr> </table>                             |                                                                                     |  |  |  |  |  |  |  |  |
|    |                                                                                                              |                                                                                                                                                                                         |                                                                                     |  |  |  |  |  |  |  |  |
|    |                                                                                                              |                                                                                                                                                                                         |                                                                                     |  |  |  |  |  |  |  |  |
|    |                                                                                                              |                                                                                                                                                                                         |                                                                                     |  |  |  |  |  |  |  |  |
| 10 | Leadership or fiduciary role in other board, society, committee or advocacy group, paid or unpaid            | <input type="checkbox"/> None<br><table border="1"> <tr><td></td><td></td></tr> <tr><td></td><td></td></tr> <tr><td></td><td></td></tr> </table>                                        |                                                                                     |  |  |  |  |  |  |  |  |
|    |                                                                                                              |                                                                                                                                                                                         |                                                                                     |  |  |  |  |  |  |  |  |
|    |                                                                                                              |                                                                                                                                                                                         |                                                                                     |  |  |  |  |  |  |  |  |
|    |                                                                                                              |                                                                                                                                                                                         |                                                                                     |  |  |  |  |  |  |  |  |

|    |                                                                                  | Name all entities with whom you have this relationship or indicate none (add rows as needed)                                                                | Specifications/Comments (e.g., if payments were made to you or to your institution) |  |  |  |  |  |  |
|----|----------------------------------------------------------------------------------|-------------------------------------------------------------------------------------------------------------------------------------------------------------|-------------------------------------------------------------------------------------|--|--|--|--|--|--|
| 11 | Stock or stock options                                                           | <input checked="" type="checkbox"/> None<br><table border="1"> <tr><td></td><td></td></tr> <tr><td></td><td></td></tr> <tr><td></td><td></td></tr> </table> |                                                                                     |  |  |  |  |  |  |
|    |                                                                                  |                                                                                                                                                             |                                                                                     |  |  |  |  |  |  |
|    |                                                                                  |                                                                                                                                                             |                                                                                     |  |  |  |  |  |  |
|    |                                                                                  |                                                                                                                                                             |                                                                                     |  |  |  |  |  |  |
| 12 | Receipt of equipment, materials, drugs, medical writing, gifts or other services | <input type="checkbox"/> None<br><table border="1"> <tr><td></td><td></td></tr> <tr><td></td><td></td></tr> <tr><td></td><td></td></tr> </table>            |                                                                                     |  |  |  |  |  |  |
|    |                                                                                  |                                                                                                                                                             |                                                                                     |  |  |  |  |  |  |
|    |                                                                                  |                                                                                                                                                             |                                                                                     |  |  |  |  |  |  |
|    |                                                                                  |                                                                                                                                                             |                                                                                     |  |  |  |  |  |  |
| 13 | Other financial or non-financial interests                                       | <input checked="" type="checkbox"/> None<br><table border="1"> <tr><td></td><td></td></tr> <tr><td></td><td></td></tr> <tr><td></td><td></td></tr> </table> |                                                                                     |  |  |  |  |  |  |
|    |                                                                                  |                                                                                                                                                             |                                                                                     |  |  |  |  |  |  |
|    |                                                                                  |                                                                                                                                                             |                                                                                     |  |  |  |  |  |  |
|    |                                                                                  |                                                                                                                                                             |                                                                                     |  |  |  |  |  |  |

Please place an "X" next to the following statement to indicate your agreement:

☒ I certify that I have answered every question and have not altered the wording of any of the questions on this form.
